# Supplementary material for: Hybridization is a recurrent evolutionary stimulus in wild yeast speciation
Source: PubMed Central journal article supplement (PMC6389940; doi:10.1038/s41467-019-08809-7), 2019-02-25
Supplement: 41467_2019_8809_MOESM1_ESM.pdf [file 41467_2019_8809_MOESM1_ESM.pdf]

## **Supplementary Information**

### **Hybridization is a recurrent evolutionary stimulus in wild yeast speciation**

Eberlein, Hénault et al.

## SUPPLEMENTARY FIGURES

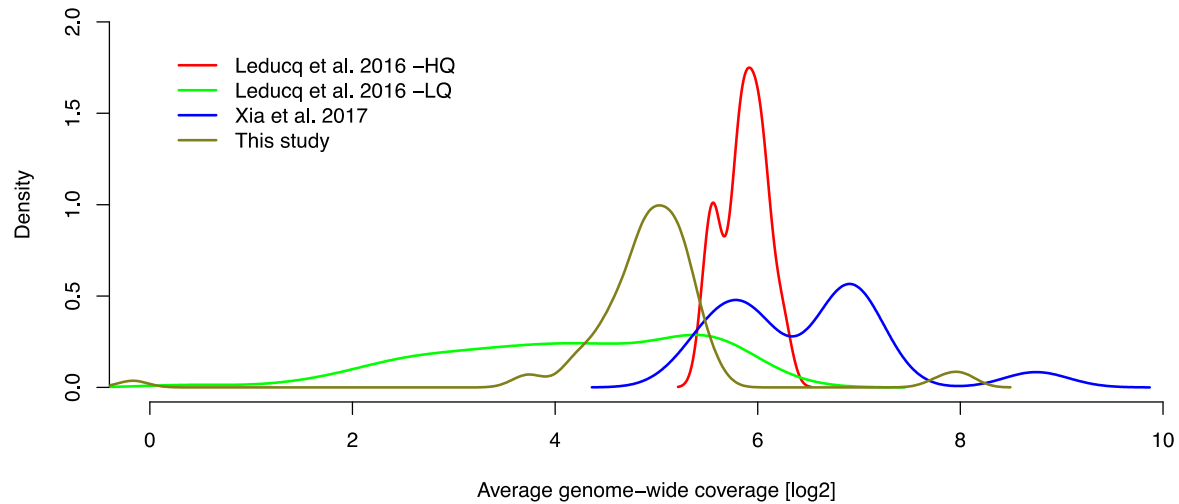

### Supplementary Figure 1: Sequencing statistics of 316 genomes.

We aligned the reads of the initially 318 sequencing libraries, including 153 strains from Leducq et al.<sup>1</sup>, 91 strains from Xia et al.<sup>2</sup> and 74 newly sequenced strains to the reference genome CBS432<sup>3</sup>, which is the European *SpA* strain. Two strains were removed from the 74 newly sequenced genomes due to sequencing errors, making a final set of 316 sequences. The alignment rate for the 316 strains was on average 82 % and resulted in an average coverage depth of 54X per strain. The lowest coverage was observed for the “*low-quality*” genomes (LQ<sup>1</sup>), with an average of 24. The 72 newly sequenced genomes in this study showed an average genome-wide coverage of 40X.

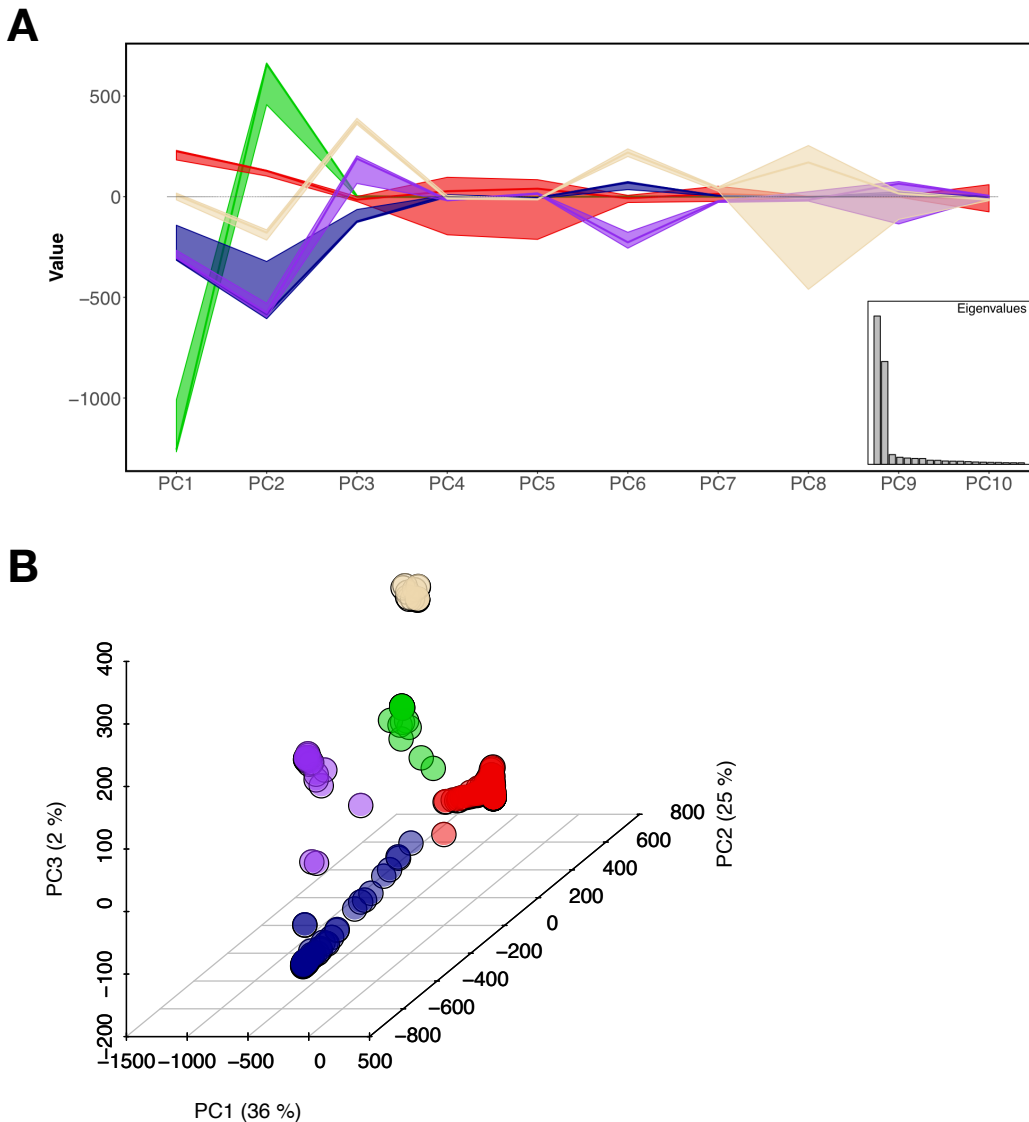

**Supplementary Figure 2: Principal component analysis (PCA) from genome-wide SNP data distinguishes the 5 main *S. paradoxus* groups.**

**(A)** A principal component analysis on 205,206 variants distributed genome-wide in 316 genomes (only showing the first ten PCs) was performed to examine the different *S. paradoxus* lineages. The bold line shows the median value for each lineage and shades the 15% and 85% quantiles. The lineages *SpC* and *SpC\**, differentiate at PC3 and PC6. *SpD* clusters independently from the other lineages. **(B)** A 3D visualization of the first 3 PCs shows the separation into the 5 genetically different clusters. The colors correspond to the strains of the different lineages (green = *SpA*, red = *SpB*, blue = *SpC*, purple = *SpC\**, beige = *SpD*).

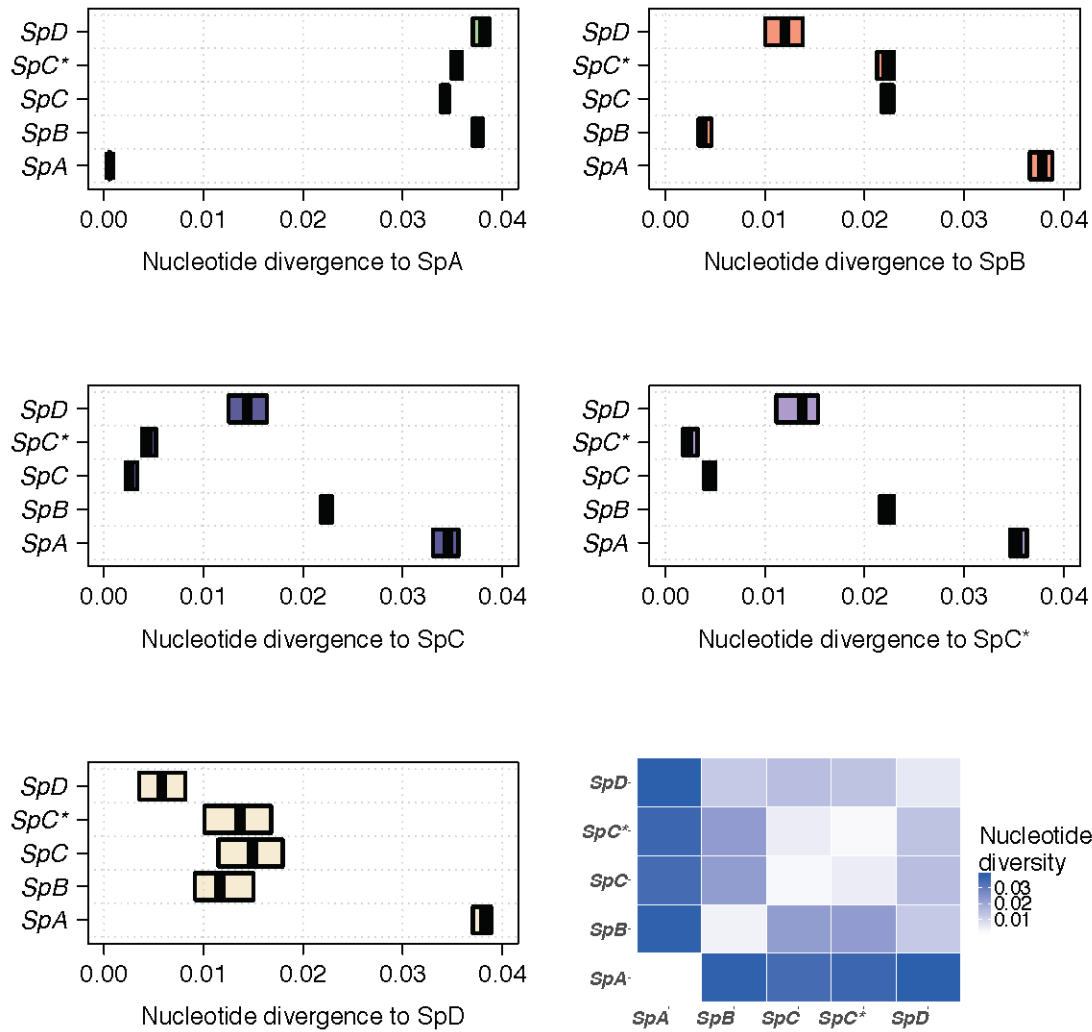

**Supplementary Figure 3: Nucleotide diversity within and between lineages.** Genetic diversity was assessed from genome-wide fasta-alignment files. The boxes represent the 25<sup>th</sup> and 75<sup>th</sup> percentiles with the median shown as a black bar. The colours of the bars correspond to the lineage was used as reference (green = *SpA*, red = *SpB*, blue = *SpC*, purple = *SpC\**, beige = *SpD*).

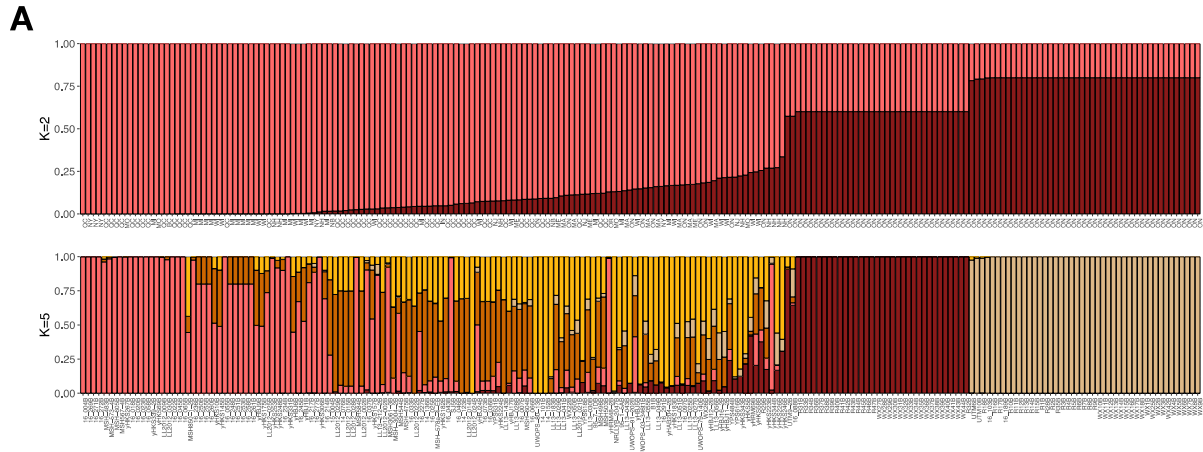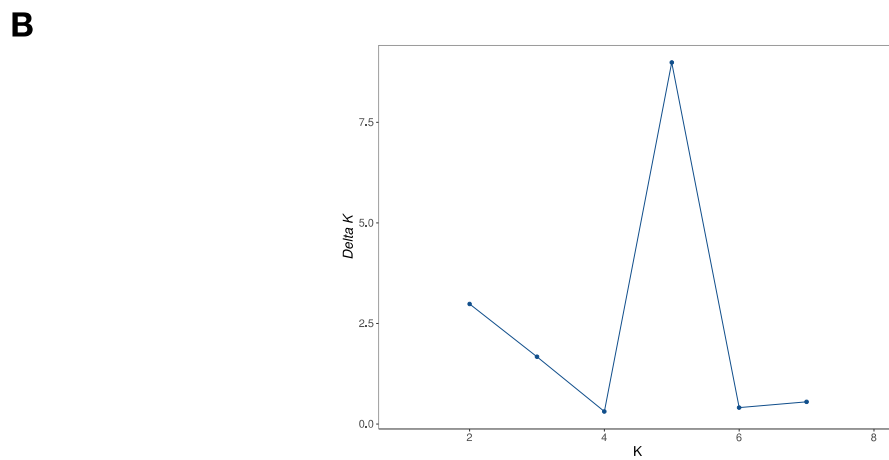

**Supplementary Figure 4: Sub-population structure within the *SpB* lineage. (A)** Bayesian inference of genetic structure in 213 *SpB* strains based on 7,973 filtered SNPs. The barplots show the proportion of membership of each *SpB* strain in different clusters. The two plots correspond to two clustering analyses assuming  $K = 2$  and the most likely number of 5 clusters. Strains are ordered according to decreasing membership in the first cluster in the analysis assuming  $K = 2$  clusters. The x-axis labels on the first plot are the abbreviations of the province/state names where the strains are located, and in the second plot they are the names of strains. This reveals potentially geographical population structure. **(B)** Plot of *Delta K* calculated with Harvester<sup>4</sup>, as a function of  $K$ .

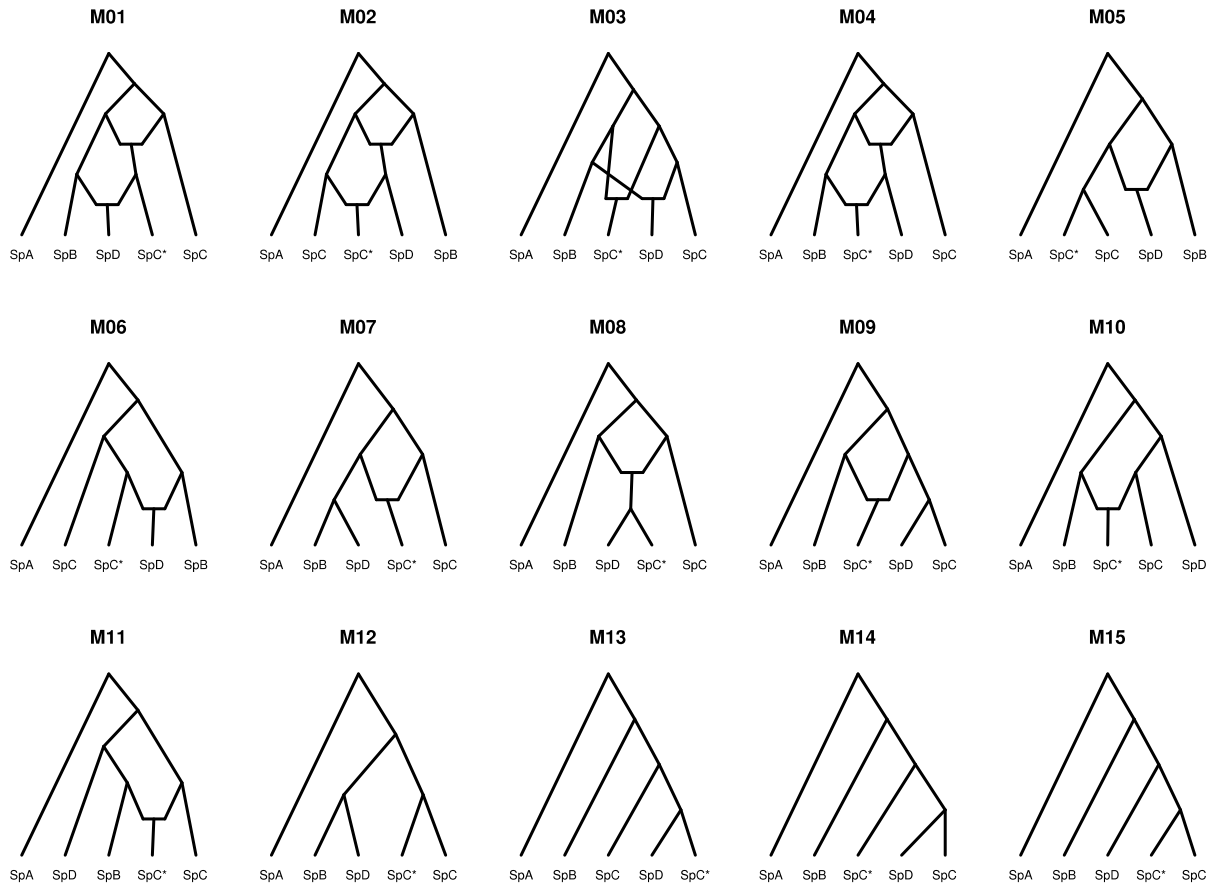

**Supplementary Figure 5: 15 tested models examining the origin of *SpD* and *SpC\**.** Models assume admixed ancestry of *SpD* and *SpC\** (M01, M02, M03, M04, M08), only admixed ancestry of *SpD* (M05, M06), only admixed ancestry of *SpC\** (M07, M09, M10, M11), and no admixture between any lineages (M12, M13, M14, M15). Note that in model M03 the order of two admixture events is arbitrary.

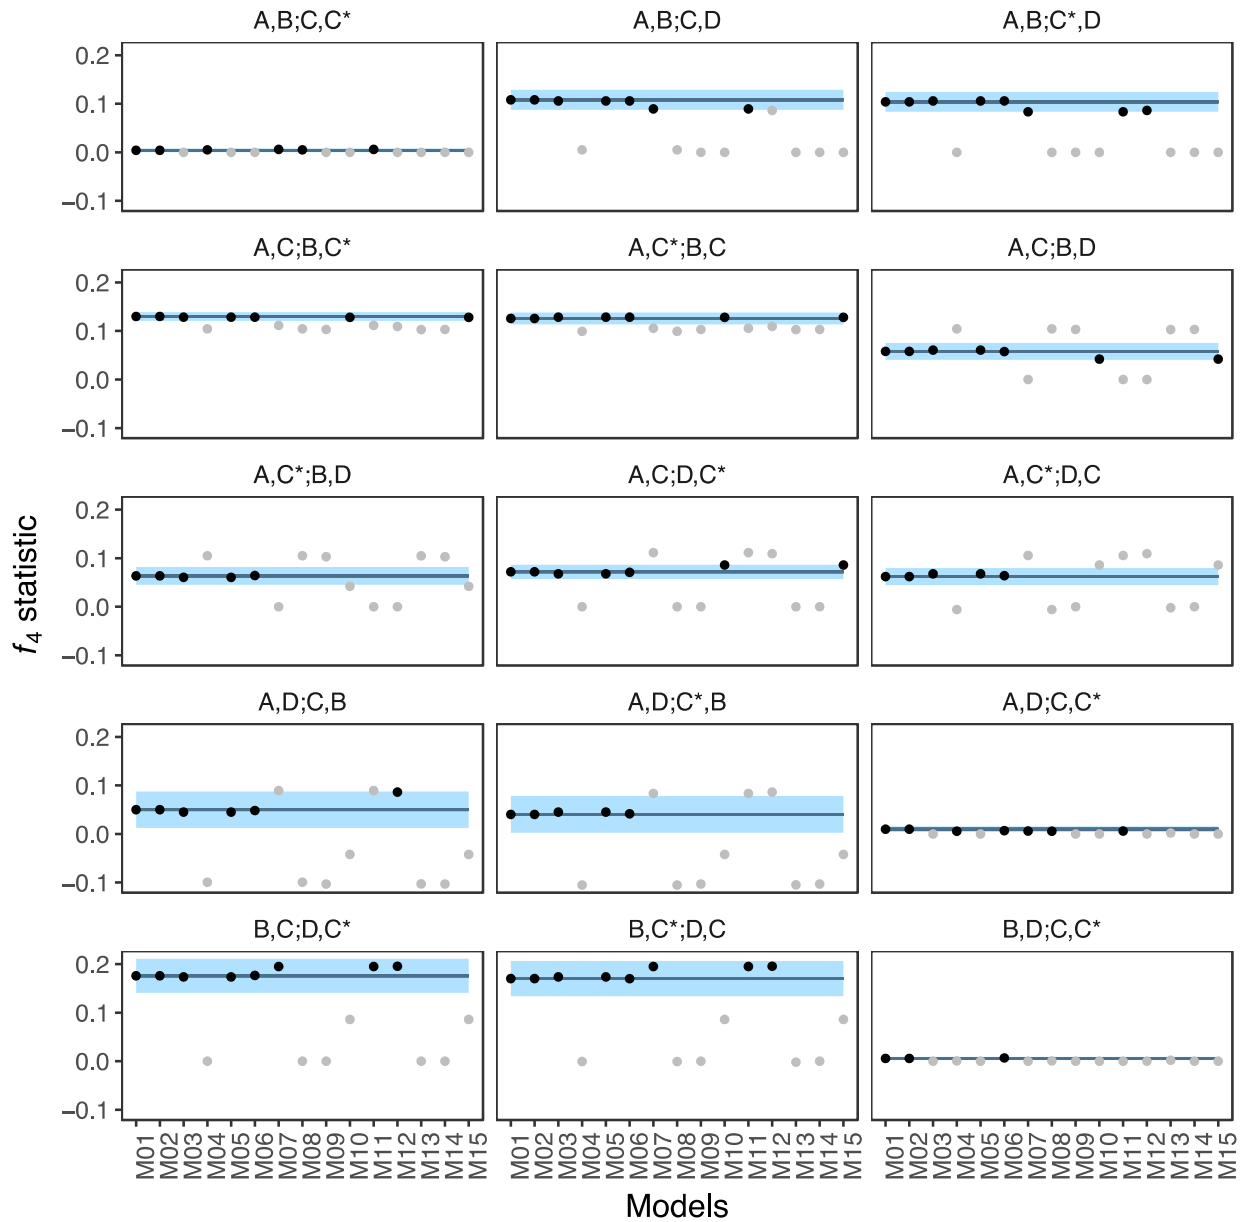

**Supplementary Figure 6: The observed and the fitted values of  $f_4$  statistics obtained for the 15 models.**

$f_4$  statistics were calculated in 15 combinations of unrooted topologies of 4 out of 5 lineages: A =  $SpA$ , B =  $SpB$ , C =  $SpC$ , C\* =  $SpC^*$  and D =  $SpD$ . Blue horizontal line and the ribbon show the observed  $f_4$  with the 3 standard errors, respectively. Black dots indicate model fitted values falling within the 3 standard errors of the observed values, and grey dots indicate fitted values falling outside of this range. Only the fitted values of models M01 and M02 match all the observed  $f_4$ .

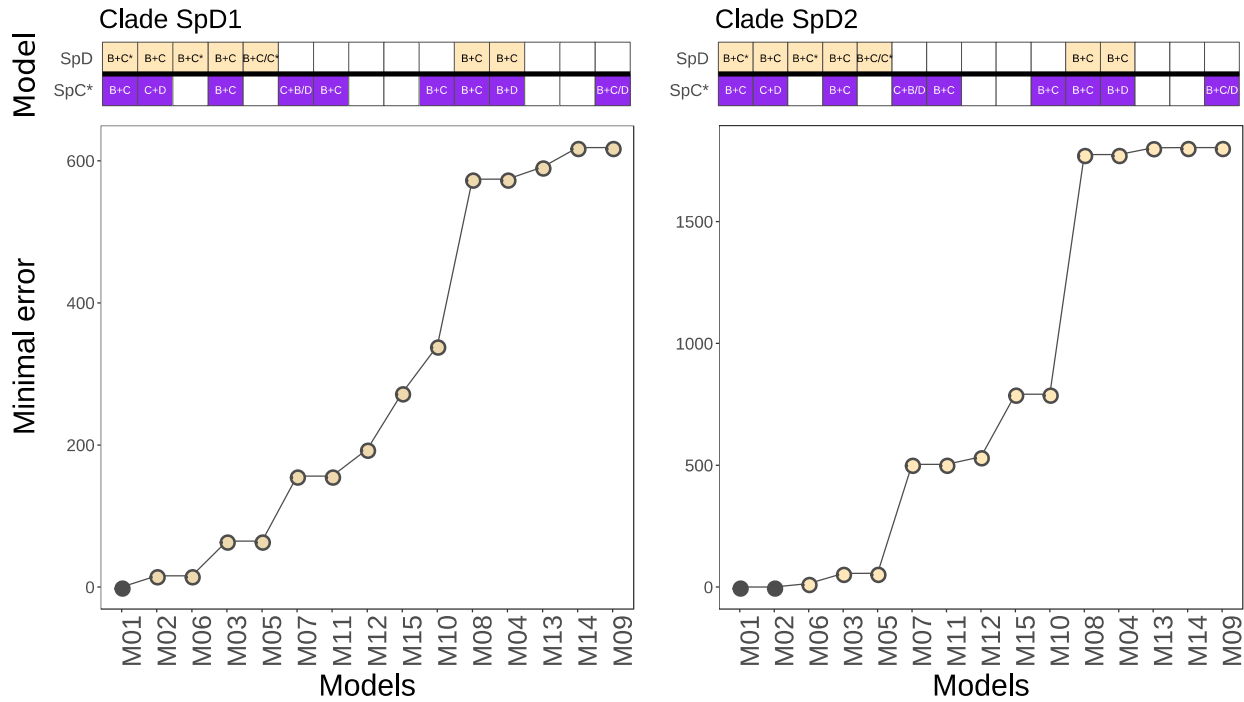

**Supplementary Figure 7: Ranking of the 15 models based on their fit to the data, where only sequences from *SpD1* strains (left plot) or *SpD2* strains (right plot) were considered.**

Filled squares on top indicate if the models assume admixed ancestry of *SpD1/SpD2* (yellow) and *SpC\** (purple). Lineage abbreviations within the squares indicate hybrid parents. The two best models with fitted values within 3 standard errors of the observed summary statistics (filled dots), suggest hybrid origin of *SpD1/SpD2* resulting from a cross between *SpB* and the hybrid *SpC\** (model M01), or hybrid origin of *SpD1/SpD2* resulting from a cross between *SpB* and *SpC*, occurring before the origin of a *SpC\** hybrid (model M02). For both *SpD1* and *SpD2*, depending on the run, the model M02 did not always give a perfect match with the observed data.



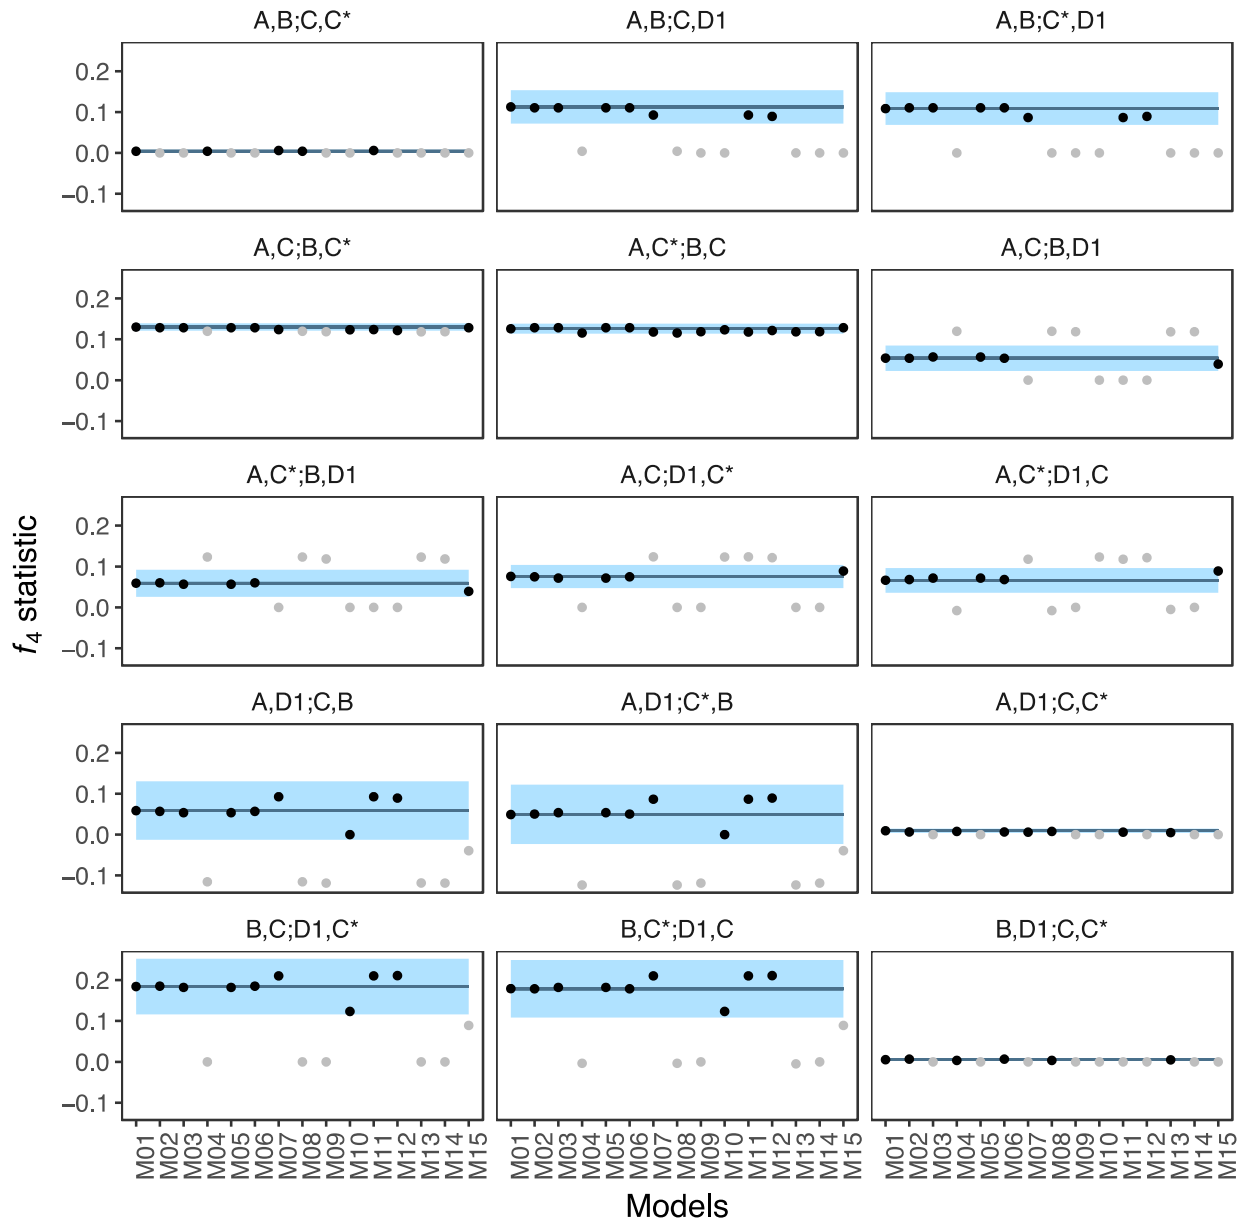

**Supplementary Figure 8: The observed and the fitted values of  $f_4$  statistics obtained for the 15 models with *SpD1* strains only.**

Models were fitted to the data, where only strains of *SpD1* group were considered.  $f_4$  statistics were calculated in 15 combinations of unrooted topologies of 4 out of 5 lineages: A = *SpA*, B = *SpB*, C = *SpC*, C\* = *SpC\** and D1 = *SpD1*. Blue horizontal lines and the ribbon show the observed  $f_4$  with the 3 standard errors, respectively. Black dots indicate model fitted values falling within the 3 standard errors of the observed values, and grey dots indicate fitted values falling outside of this range. Only the fitted values of models M01 and M02 match all the observed  $f_4$ .

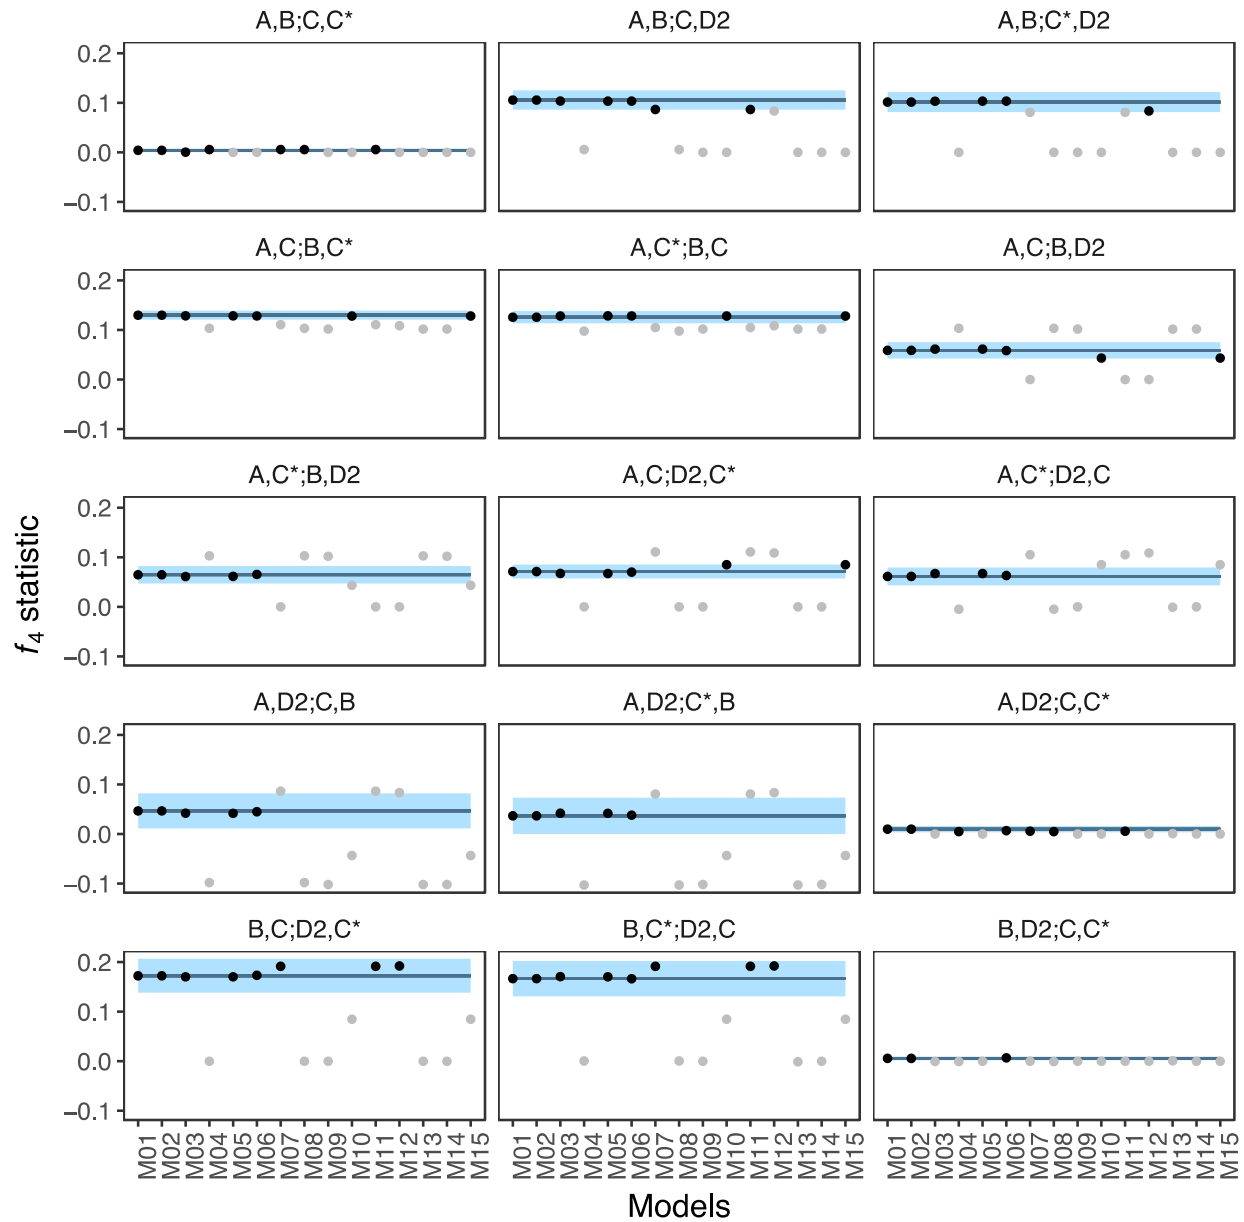

**Supplementary Figure 9: The observed and the fitted values of  $f_4$  statistics obtained for the 15 models with *SpD2* strains only.**

Models were fitted to the data, where only strains of *SpD2* group were considered.  $f_4$  statistics were calculated in 15 combinations of unrooted topologies of 4 out of 5 lineages: A = *SpA*, B = *SpB*, C = *SpC*, C\* = *SpC\** and D2 = *SpD2*. Blue horizontal line and the ribbon show the observed  $f_4$  with the 3 standard errors, respectively. Black dots indicate model fitted values falling within the 3 standard errors of the observed values, and grey dots indicate fitted values falling outside of this range. Only the fitted values of models M01 and M02 match all the observed  $f_4$ .

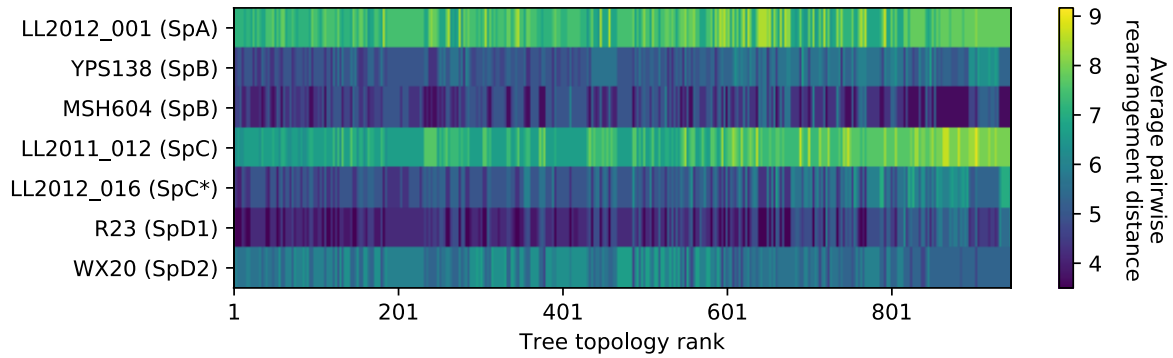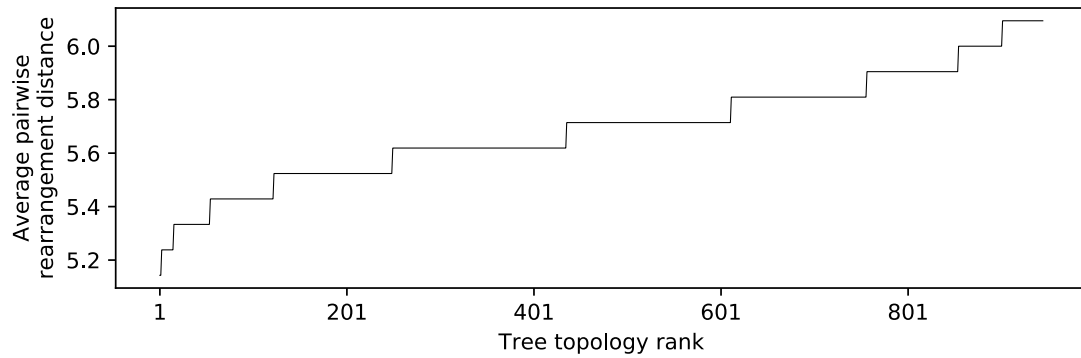

**Supplementary Figure 10: Selection of the best tree topologies describing genomic rearrangements using a maximal parsimony criterion.** Average pairwise rearrangement distance (in number of rearrangements) is displayed for individual terminal nodes (top) or for all terminal nodes aggregated (bottom). The topologies are ranked according to the aggregated average pairwise rearrangement distance.

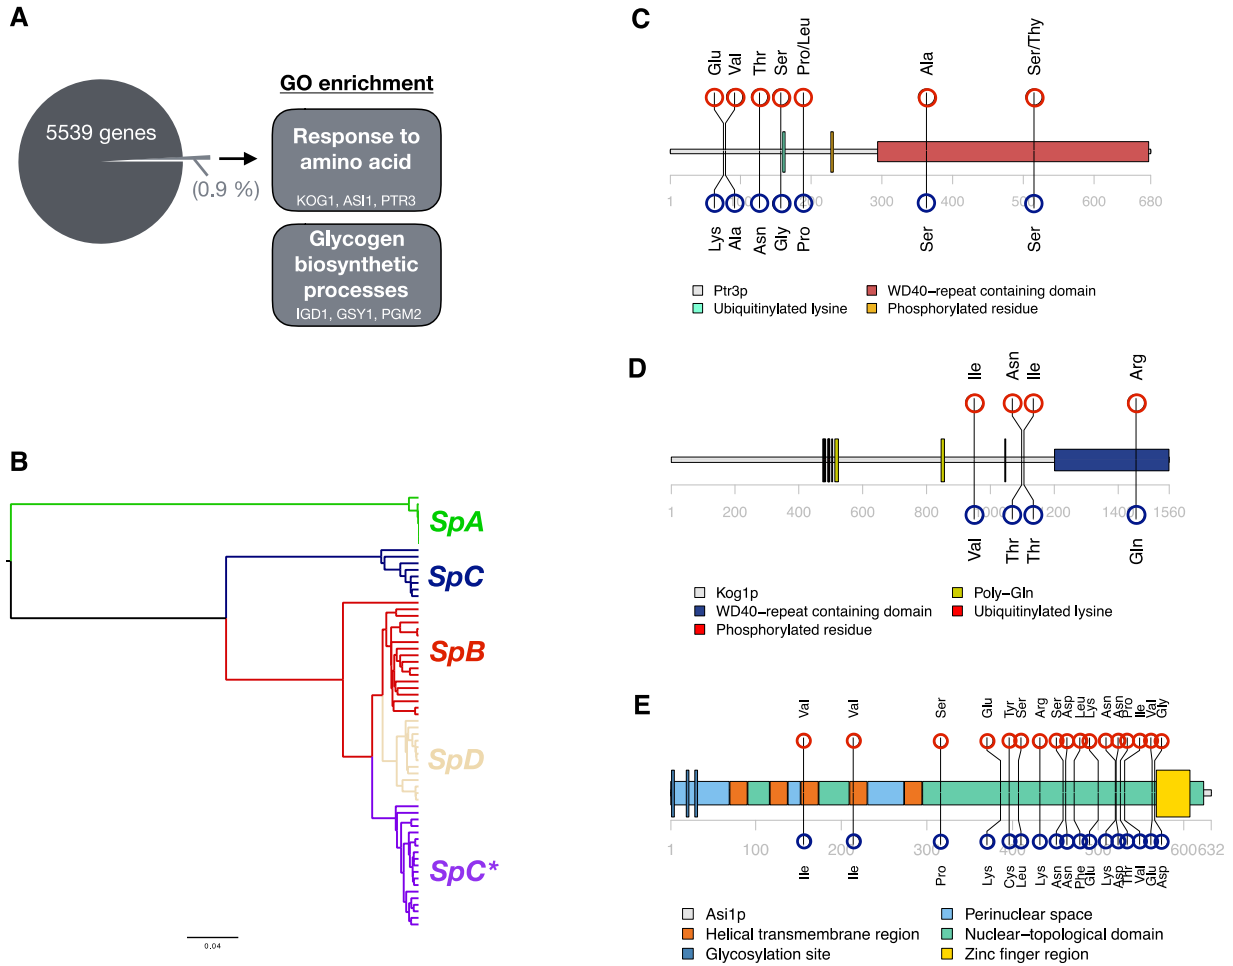

**Supplementary Figure 11: Genes in *SpC\** introgressed from *SpB* are enrichment for the biological process *response to amino acid*.**

**(A)** The 51 introgressed and fixed genes in *SpC\** (*SpB*-like) revealed GO enrichment for response to amino acid and glycogen biosynthetic process (See: Supplementary table 8-9). **(B)** Phylogenetic tree showing the similarity of *SpB* introgression in *SpC\**. Sequence similarity of 51 concatenated genes shows the inheritance from *SpB*. The new lineage *SpD* groups in-between *SpB* and *SpC\**. The phylogenetic tree was constructed from a subset of 66 individuals. **(C-E)** Amino acid differences between *SpB* and *SpC* in the introgressed genes *PTR3*, *KOG1* and *ASI1*. These fixed amino acid changes in the introgressed genes *PTR3*, *KOG1* and *ASI1* could potentially have functional consequences (red circles: amino acids in *SpB*, blue circle: amino acid in *SpC*). Information about functional domains was obtained from <http://www.rcsb.org/>.

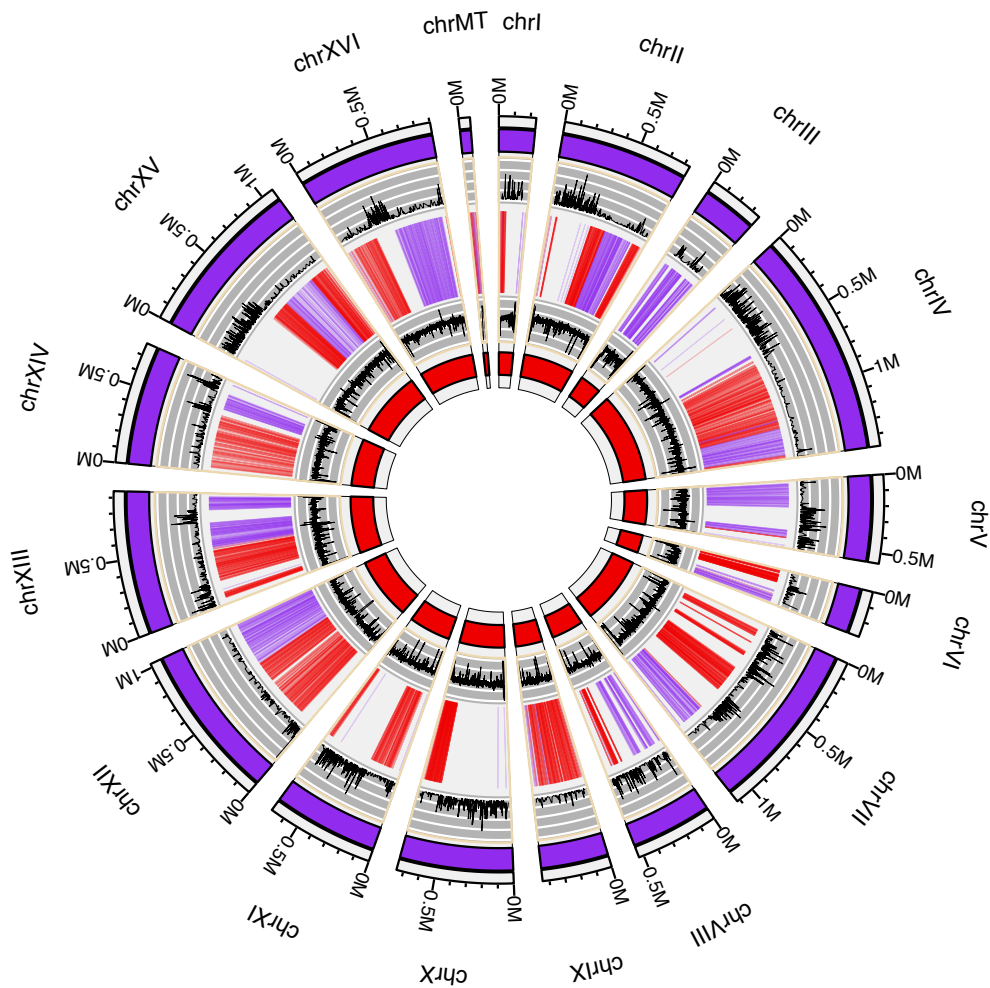

**Supplementary Figure 12: *SpD* strain WX21 shows heterozygous loci across the genome.**

The *SpD* strain WX21 shows many regions that could not be assigned confidently to *SpB* (inner red ring) or *SpC\** (outer purple ring) introgression (blank regions, middle circle), which stands in contrast to the other 12 *SpD* strains (Figure 3A). We confirmed the presence of mapped sequence data (inner circle, coverage data corresponds to the average coverage from 1 kb windows) throughout the genome and could show that the non-defined regions (in white) correspond to peaks of heterozygosity (outer rings; counts of heterozygous sites were calculated per 1kb window).

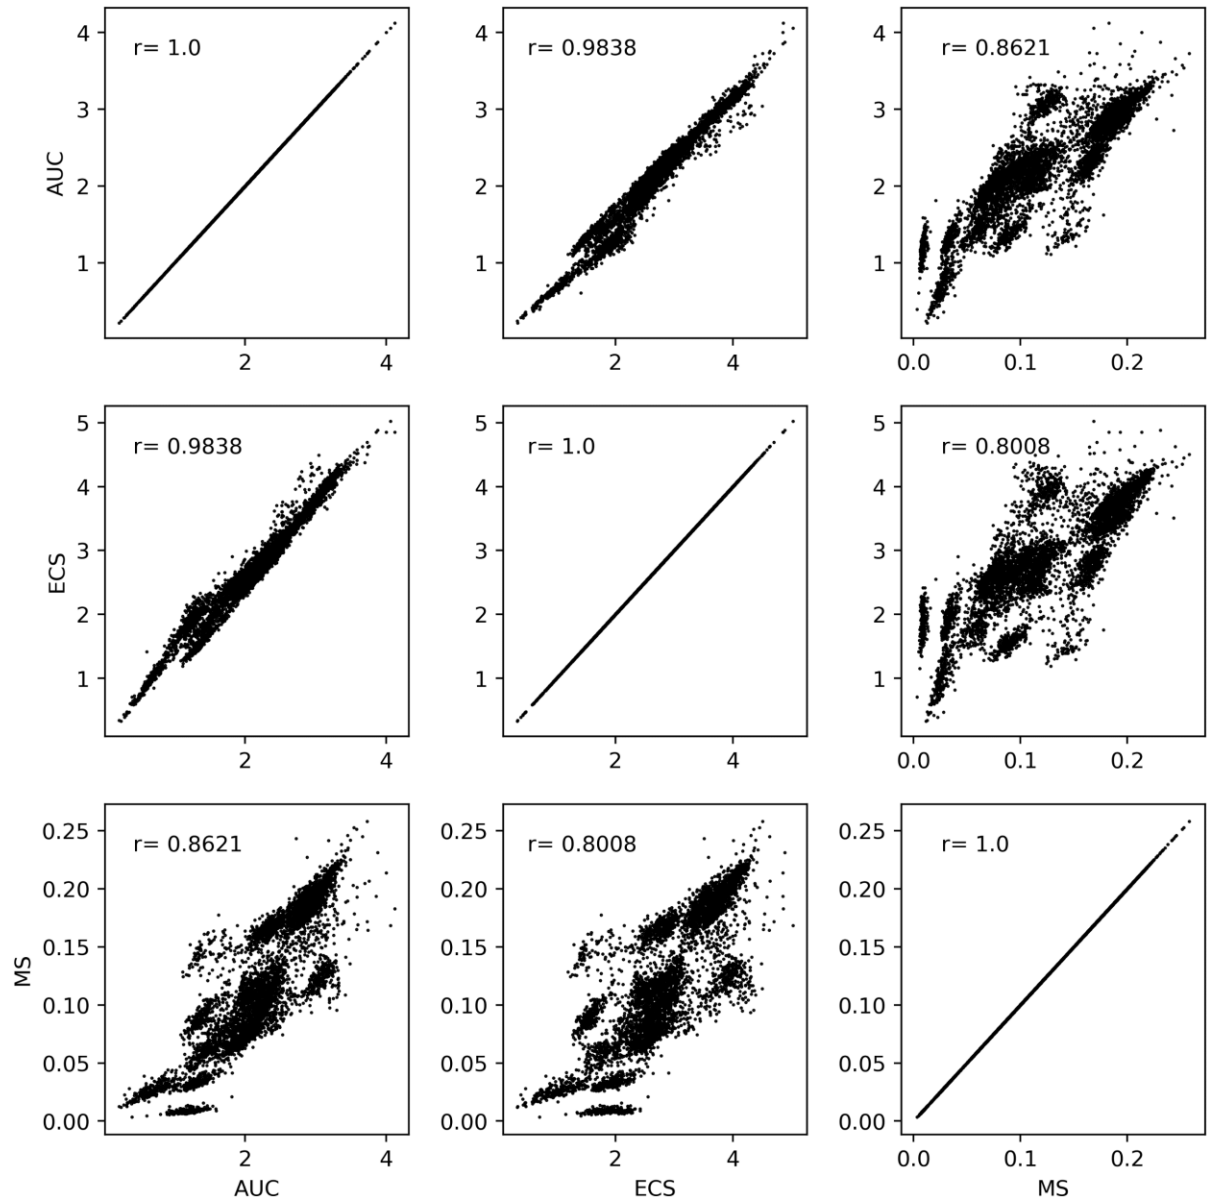

**Supplementary Figure 13: Correlations between colony growth traits AUC, ECS and MS.**

AUC corresponds to the integrated growth through time, ECS corresponds to the latest point of the growth curve, and MS corresponds to the maximal growth rate. See Methods for the calculation details for each trait.

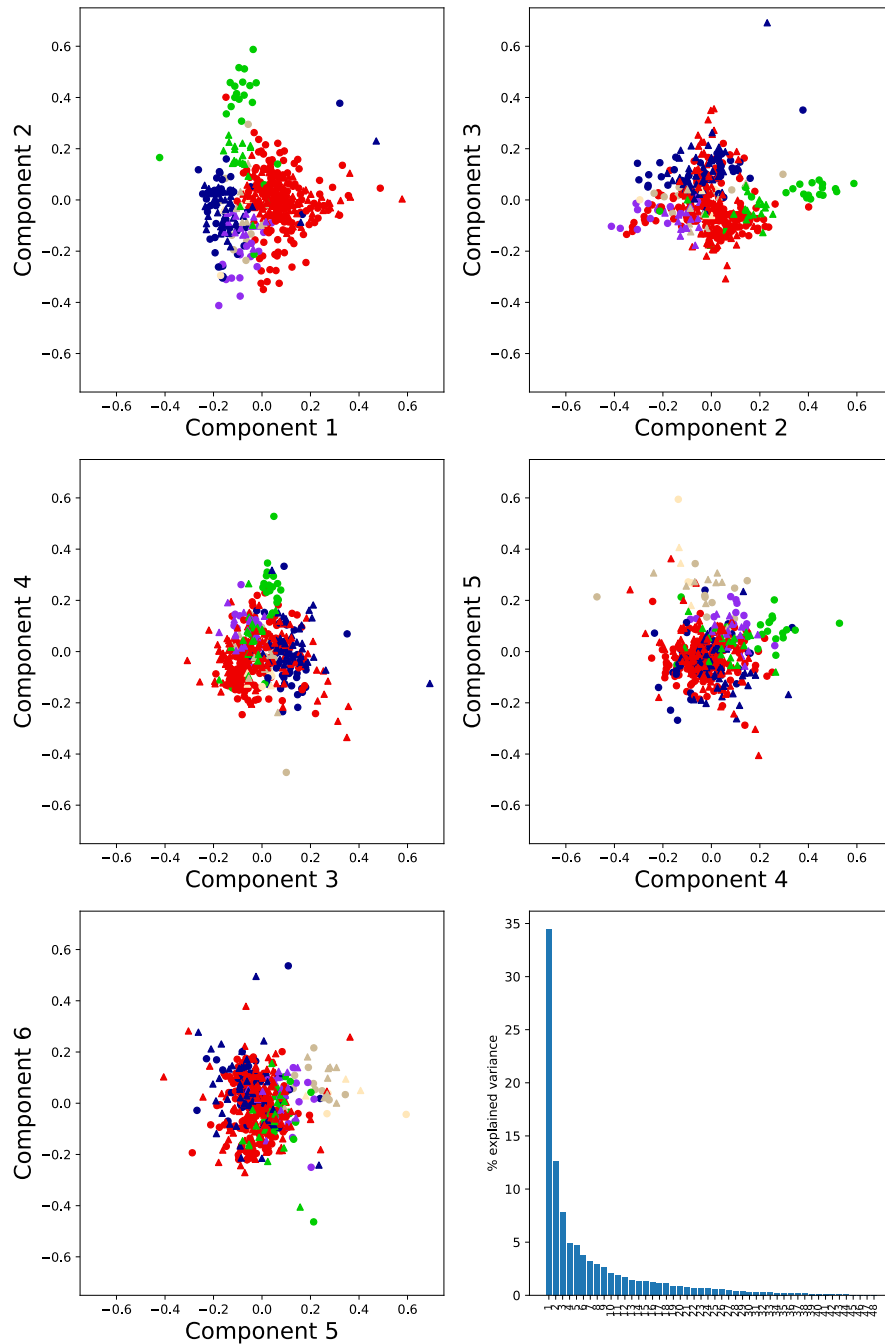

**Supplementary Figure 14: Multiple factor analysis (MFA) performed on combined AUC and MS values.**

The first six principal components are shown. Circles and triangles correspond to AUC and MS values, respectively. Dot colors correspond to the lineages where strains are color-coded (green = *SpA*, red = *SpB*, blue = *SpC*, purple = *SpC\**, light beige = *SpD1*, dark beige = *SpD2*). The proportion of explained variance for each component is indicated above the corresponding bar in the bottom right subpanels.

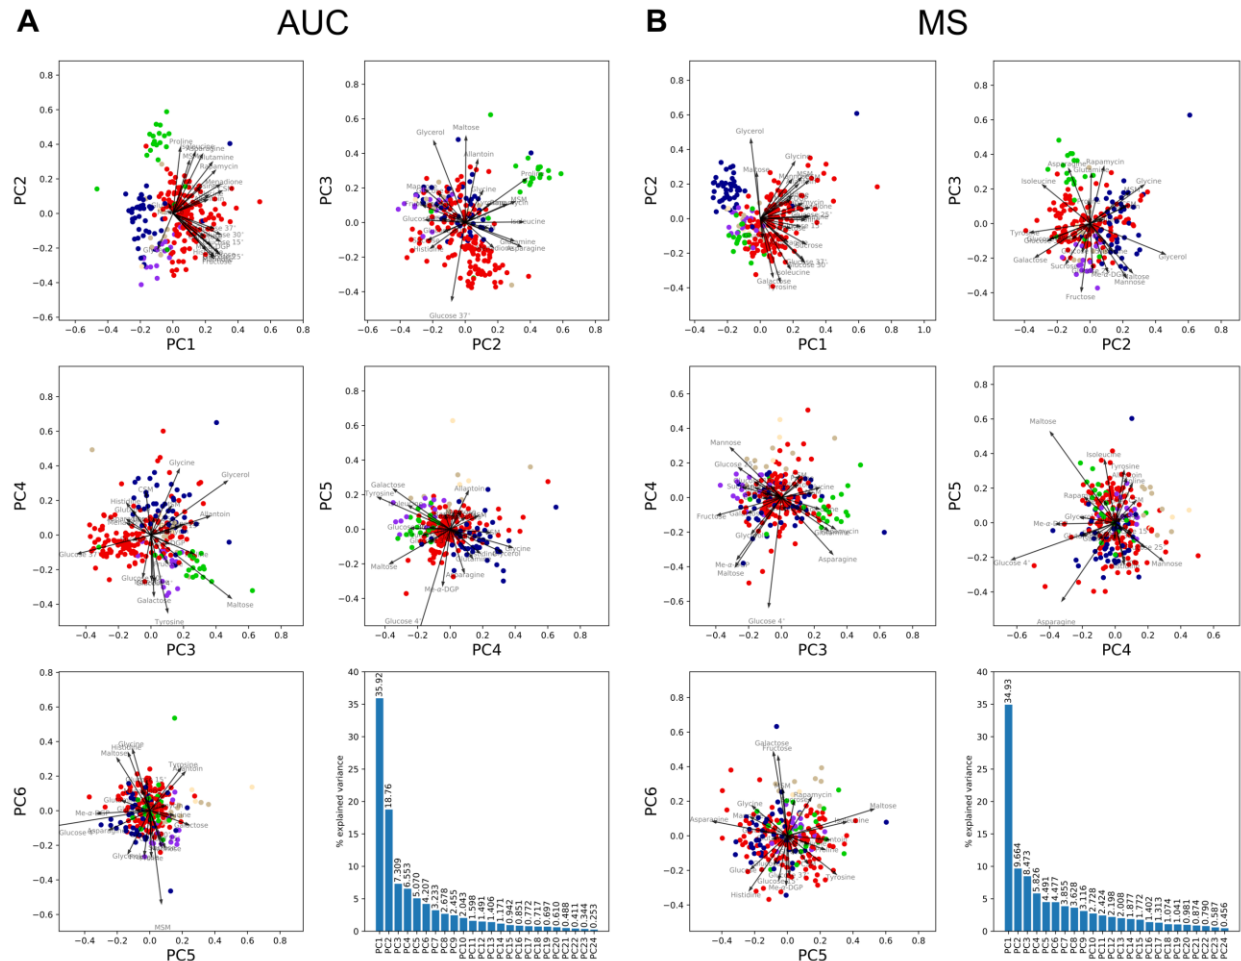

**Supplementary Figure 15: Principal component analysis (PCA) performed on (A) AUC and (B) MS values.**

The first six principal components are shown. Dot colors correspond to the lineages where strains are color-coded (green = *SpA*, red = *SpB*, blue = *SpC*, purple = *SpC\**, light beige = *SpD1*, dark beige = *SpD2*). The proportion of explained variance for each principal component is indicated above the corresponding bar in the bottom right subpanels.



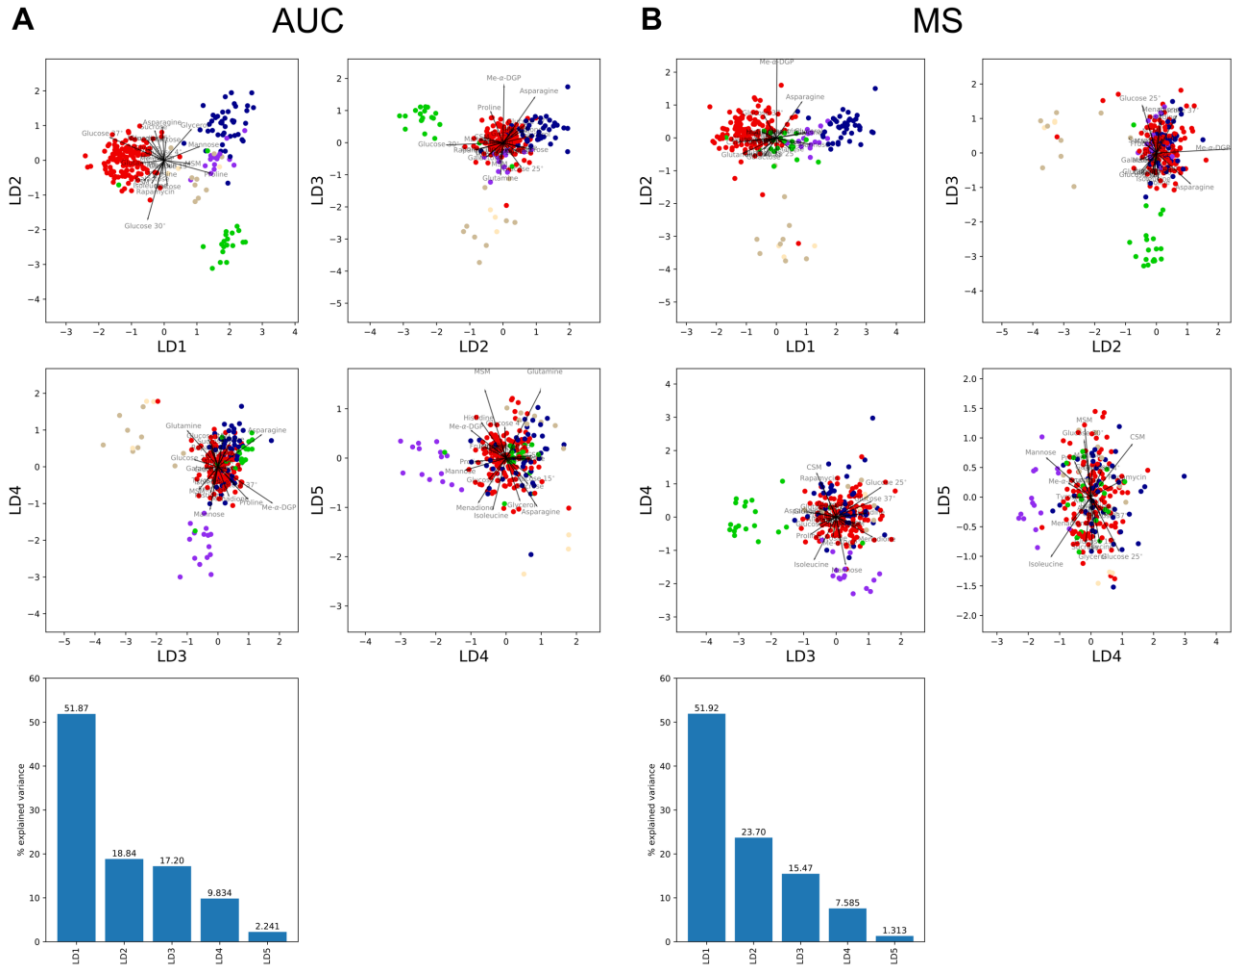

**Supplementary Figure 16: Linear discriminant analysis (LDA) performed on (A) AUC and (B) MS values.**

Dot colors correspond to the lineage where strains are color-coded (green = *SpA*, red = *SpB*, blue = *SpC*, purple = *SpC\**, light beige = *SpD1*, dark beige = *SpD2*). The proportion of explained variance for each linear discriminant is indicated above the corresponding bar in the bottom right subpanels.

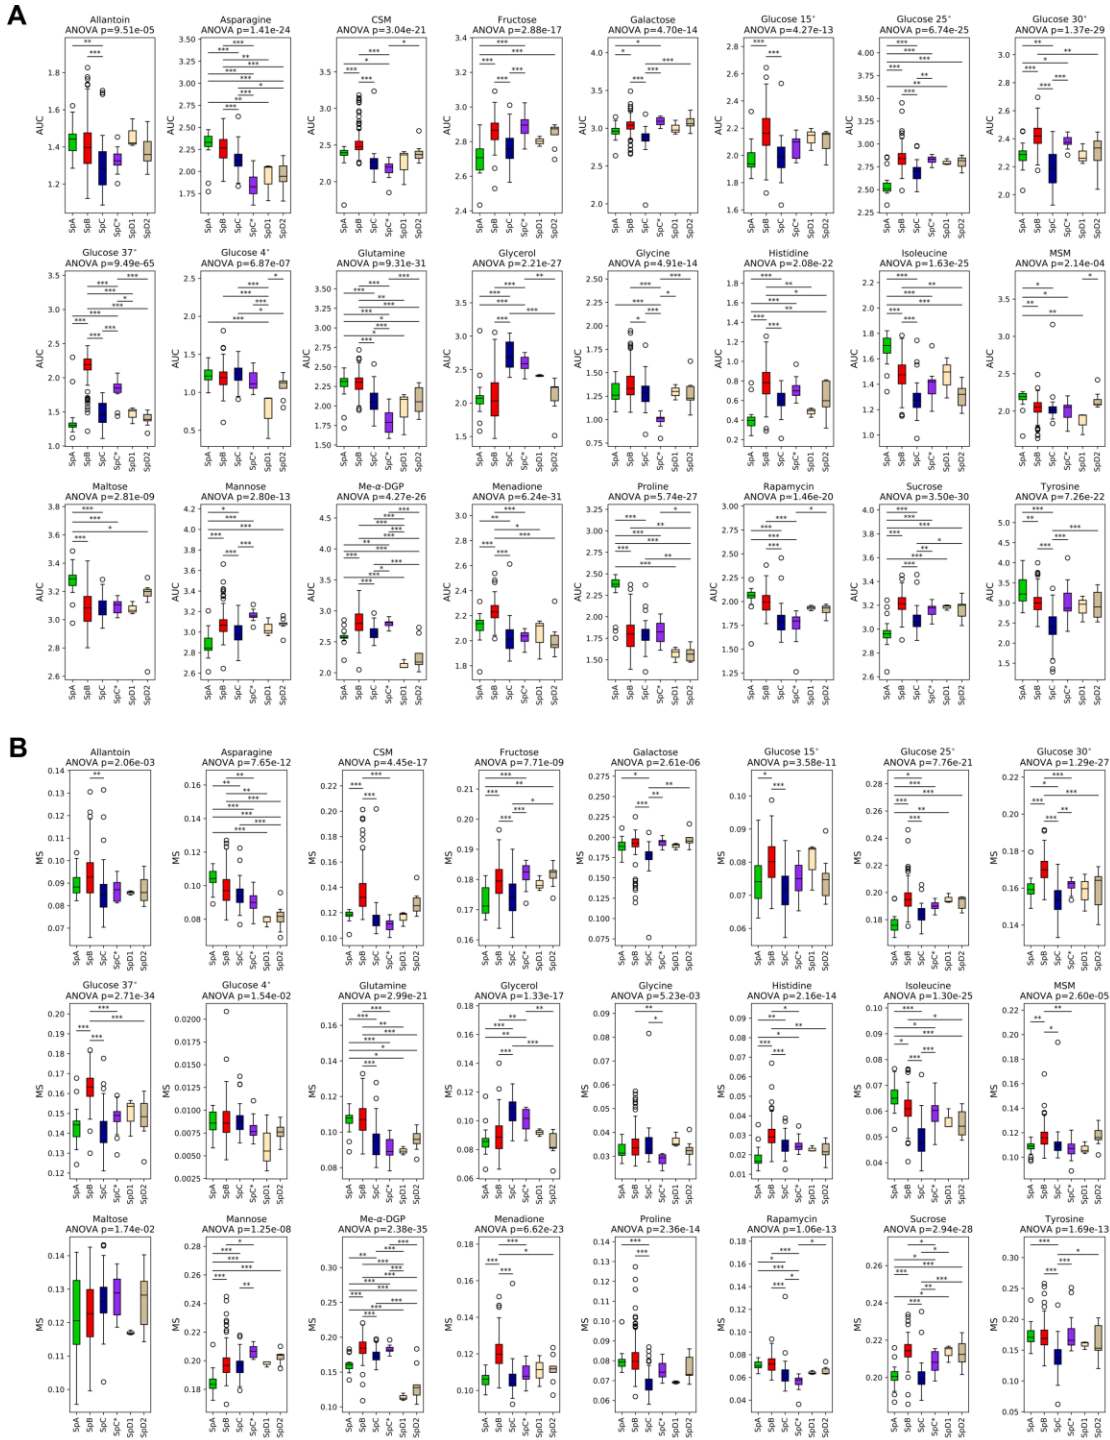

**Supplementary Figure 17: Growth comparison per lineage for the (A) AUC and (B) MS traits.**

Significant differences between lineages are indicated above the corresponding boxes (Tukey's HSD;  $p < 0.05$ : \*,  $p < 0.01$ : \*\*,  $p < 0.001$ : \*\*\*). The p-value for one-way ANOVAs performed on data for each condition separately is shown. CSM: complete synthetic medium; Me- $\alpha$ -DGP: methyl- $\alpha$ -D-glucopyranoside; MSM:

minimal synthetic medium. The boxes represent the 25<sup>th</sup> and 75<sup>th</sup> percentiles with the median shown as a black bar.

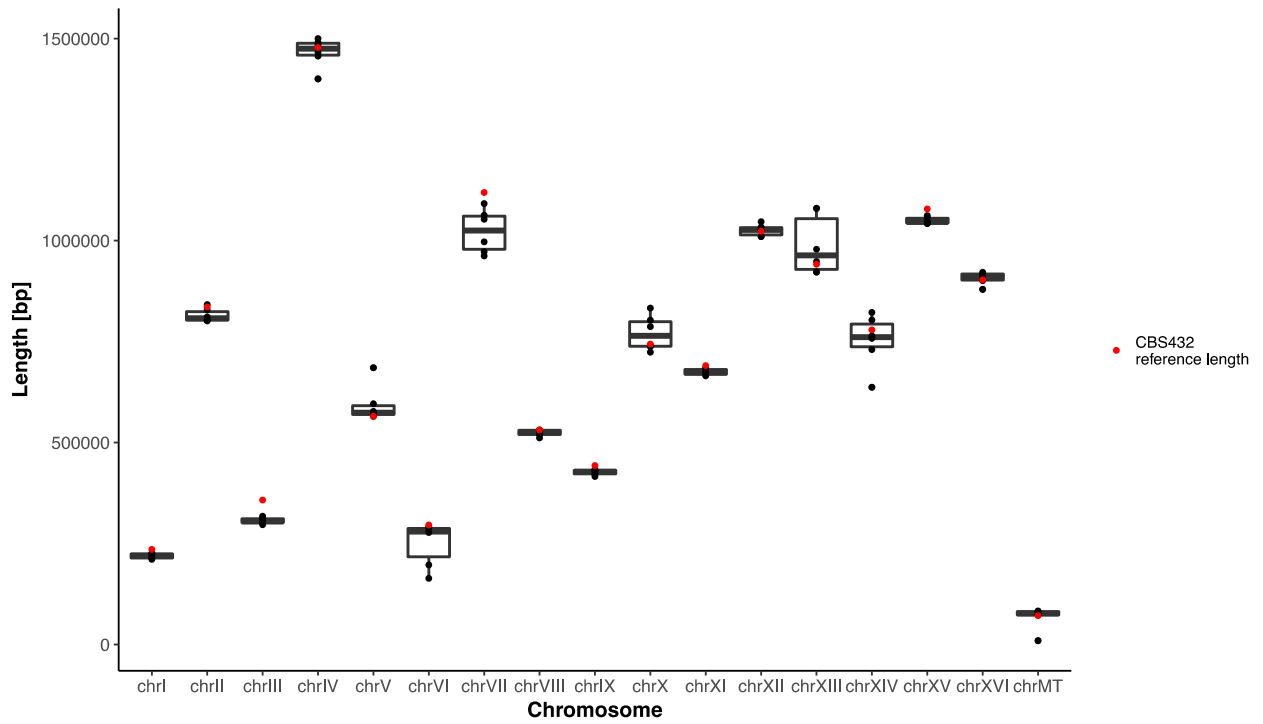

**Supplementary Figure 18: *De novo* assembly of lineage-specific reference genomes for mapping genome-wide expression data.**

We prepared reference genomes specific for the lineages *SpA*, *SpB*, *SpC*, *SpC\** and one for each subclade of *SpD* (*SpD1*, *SpD2*). The 6 reference genomes show small variation in chromosome size among each other and to the reference genome CBS432<sup>3</sup>. The boxes represent the 25<sup>th</sup> and 75<sup>th</sup> percentiles with the median shown as a black bar.

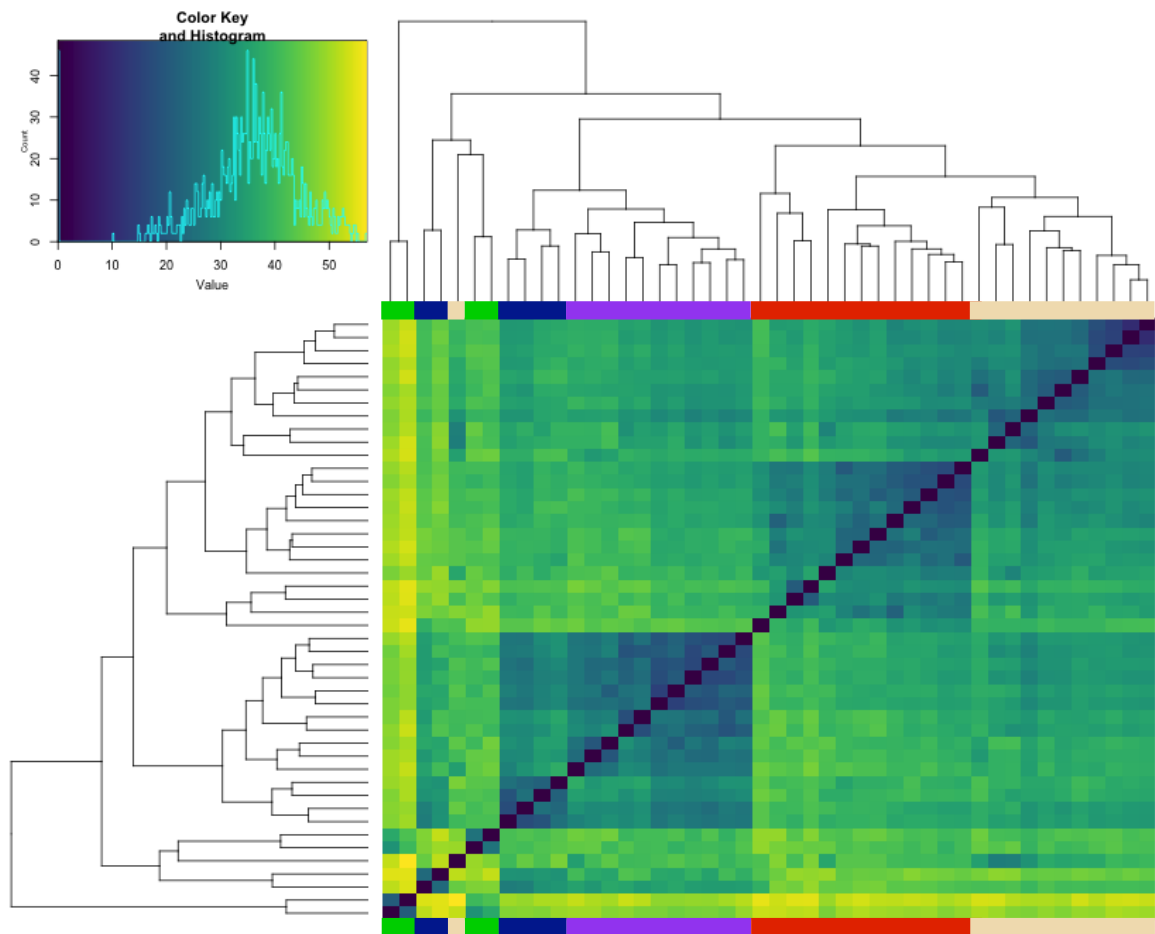

**Supplementary Figure 19: Average genome-wide expression profile similarity for 46 strains from all main lineages of *S. paradoxus*.**

Overall genome-wide expression calculated in DeSeq<sup>5</sup> from 5,160 genes showed similar relationships between the lineages as observed from genome-wide sequence data (Figure 1B-C). There is one outlier strain of *SpD*, which groups to *SpC*, however do not show any aberration in the principal component analyses (Figure 4D, Supplementary Figure 21). Strains are color-coded to distinguish lineages (green = *SpA*, red = *SpB*, blue = *SpC*, purple = *SpC\**, beige = *SpD*).

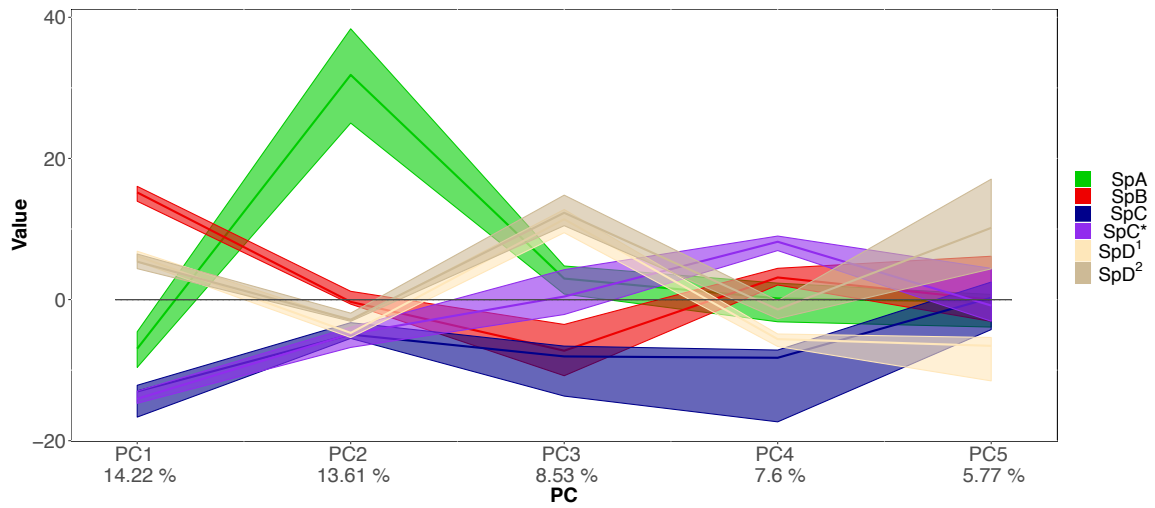

**Supplementary Figure 20: Grouping of strains according to principal component analysis based on expression levels of 5,160 genes.**

The most important PC, PC1, distinguishes the main groups *SpA*, *SpB*, *SpC* and *SpD* but does not distinguish *SpC\** and *SpC*. PC3 and PC4 splits *SpC* and *SpC\** strains into separate clusters, PC5 splits the two different *SpD* clades. Bold lines correspond to the median value and the color shades to the 15% and 85% quantiles.

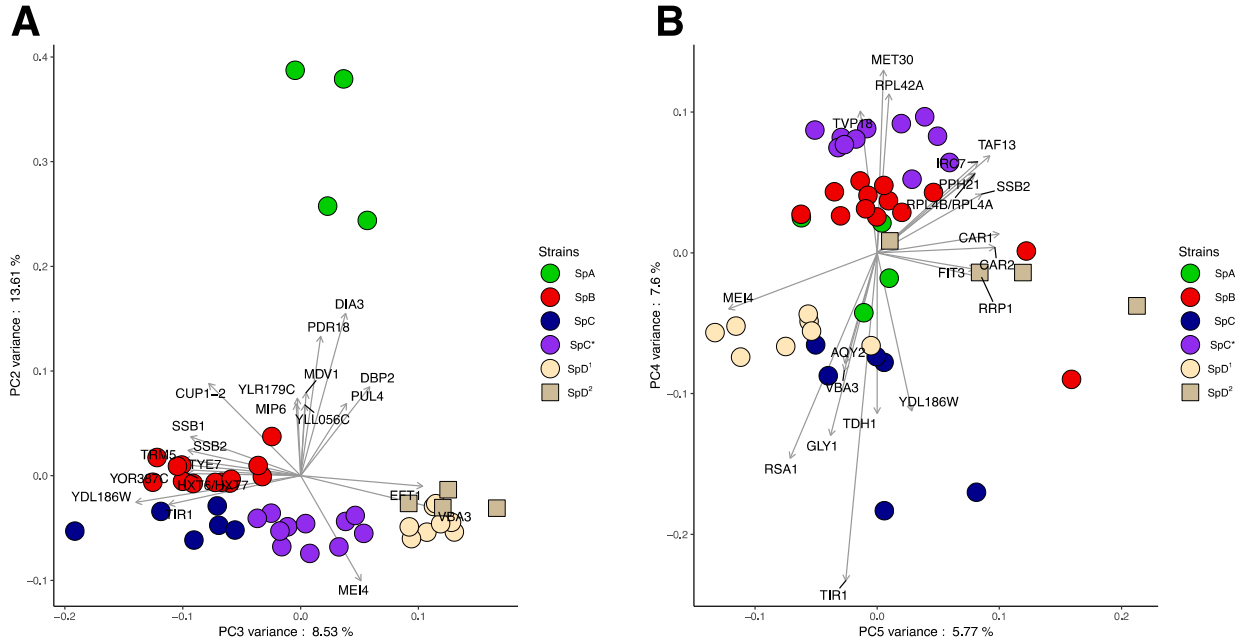

**Supplementary Figure 21: Principal component analysis on genome-wide expression data splits the main lineages into independent clusters.**

**(A)** Independent clusters for the lineages *SpC* and *SpC\**. The principal component PC3 explaining 8.5% of the variance separates the two lineages *SpC* and *SpC\**. **(B)** PC4 and PC5, explaining cumulatively 13.4% of variance, splits the *SpD* lineage into the two subclades of *SpD1* and *SpD2*. Genes were ranked accordingly to their explained variance (high to low) and plots show only the 20 strongest candidates.

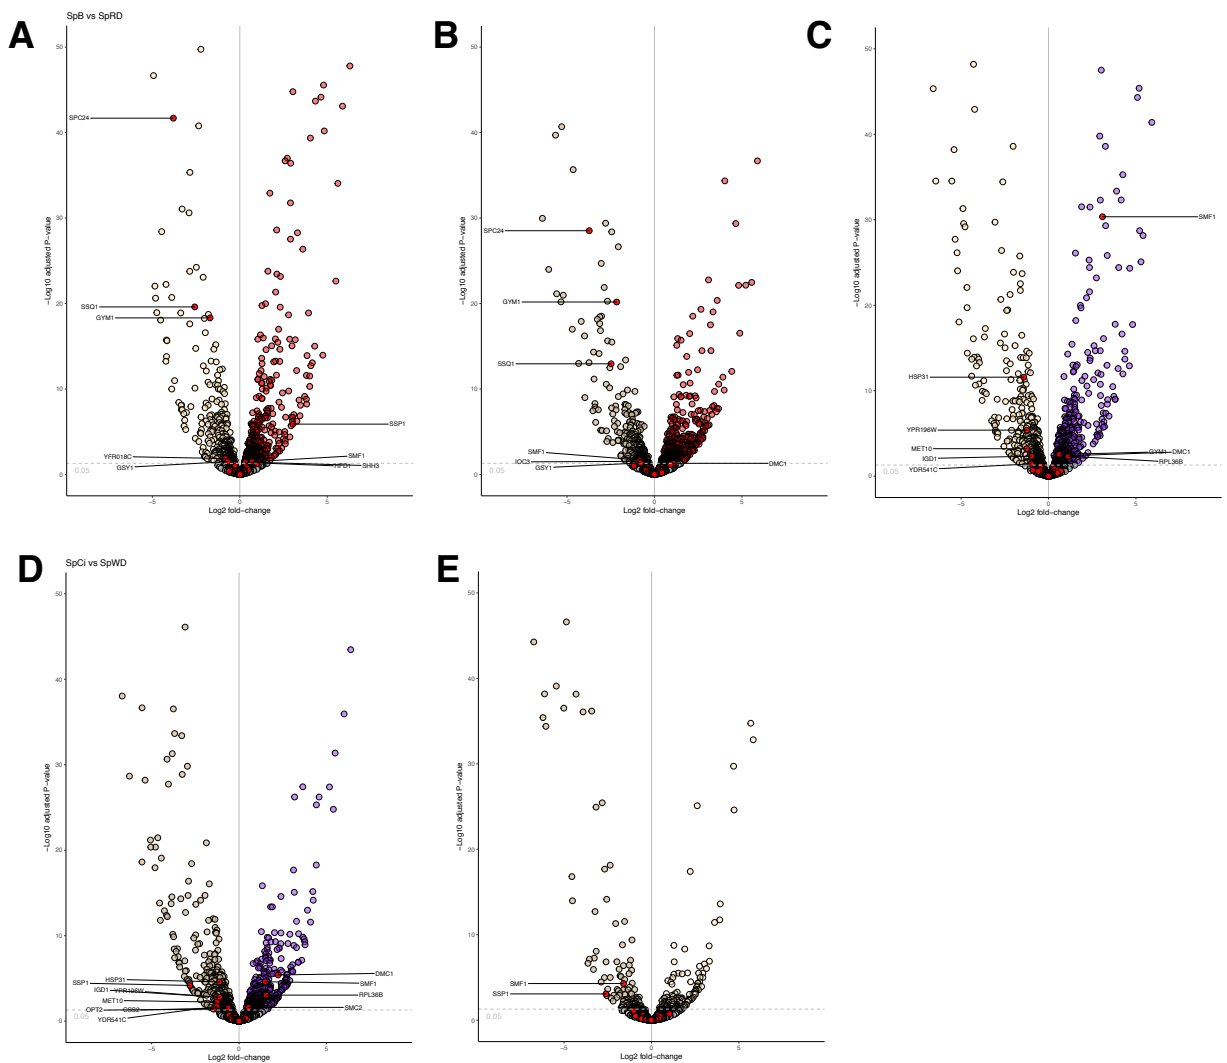

**Supplementary Figure 22: Pairwise comparison of gene expression between the lineages *SpB*, *SpC*, *SpD1* and *SpD2*.**

Pairwise comparison of (A) *SpB* and *SpD1*, (B) *SpB* and *SpD2*, (C) *SpC\** and *SpD1*, (D) *SpC\** and *SpD2*, and (E) *SpD1* and *SpD2*. Volcano plots showing the pairwise comparison of expression of 5,160 genes. We used the average expression per gene for each lineage to performed subsequent Gene-Ontology enrichment analyses on ranked data (p-adjust value; Supplementary table 7). Lineages are color coded (*SpB* = red, *SpC* = blue, *SpC\** = purple, *SpD*= beige). In dark red are the expression profiles of 48 out of the 51 introgressed genes that are fixed in all *SpC\** individuals and have been inherited from *SpB*.

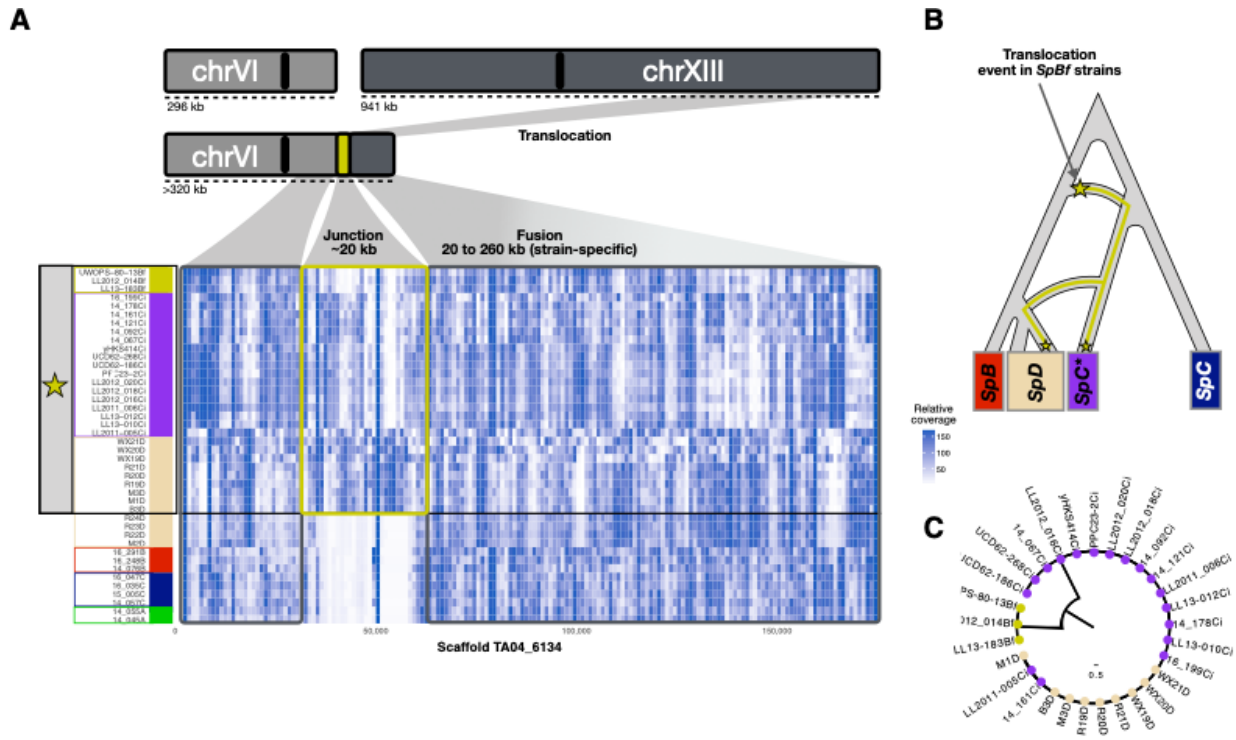

**Supplementary Figure 23: Detection of genomic translocation VItXIII in a subset of 42 strains.**

(A) *SpD2* inherited the translocation VItXIII. We detected the translocation VItXIII in *SpD* strains that belong to the sub-group *SpD2*. This translocation was previously identified in *SpC\** and in *SpBf*. Using the scaffold TA04\_6134 (~170 kb; *SpC\** strain LL2012\_018) from Leducq et al.<sup>1</sup>, a fragment of ~20 kb was only present in the strains that contain the fusion of chromosome VI with the right arm of chromosome XIII. The fused part from chromosome XIII was shown to be variable in size, ranking from 20 up to 260 kb in different *SpC\** strains<sup>1</sup>. The heat map represents the coverage along the scaffold calculated in 1 kb windows. (B) Schematic view the inheritance of VItXIII. Translocation VItXIII was transmitted from *SpBf* strains (3 *SpB* strains that carry the fusion; Leducq et al.<sup>1</sup>) into *SpC\** upon secondary contact with *SpC*. It was further inherited only from *SpD2* from crosses between *SpC\** and *SpB*. (C) Phylogenetic relationship of strains that carry the fusion. The ~20 kb fused fragment that corresponds to the junction sequence shows that *SpBf* strains are the sister clade to *SpC\** and *SpD*, showing that this region is closer to *SpC\** in *SpD* than it is to *SpB* strains.



## SUPPLEMENTARY TABLES

**Supplementary Table 1: Strains sequenced with long-read sequencing and de novo assembly statistics.**

| Systematic Name | Ploidy  | Genotype | Genetic_Group     | Location_Sampled                                   | Substrate_Sampled  |
|-----------------|---------|----------|-------------------|----------------------------------------------------|--------------------|
| LL2012_001      | Diploid | Wild     | <i>SpA</i>        | Hull, Quebec, Canada                               | Bark - Oak tree    |
| MSH-604         | Diploid | Wild     | <i>SpB</i>        | Mont St Hilaire, Quebec, Canada                    | Bark - Oak tree    |
| LL2011_012      | Diploid | Wild     | <i>SpC</i>        | Station Dushesnay, Quebec, Canada                  | Bark - Mapple tree |
| LL2012_016      | Diploid | Wild     | <i>SpC*</i>       | Pointe Platon, Quebec, Canada                      | Bark - Oak tree    |
| R23             | Diploid | Wild     | <i>SpD (SpD1)</i> | University of Toronto Mississauga, Ontario, Canada | Quercus            |
| WX20            | Diploid | Wild     | <i>SpD (SpD2)</i> | University of Toronto Mississauga, Ontario, Canada | Quercus            |

| Systematic Name | Published in                | lon         | lat        | Total size (nt) | Number of contigs | Number of chromosomes | N50 (nt) |
|-----------------|-----------------------------|-------------|------------|-----------------|-------------------|-----------------------|----------|
| LL2012_001      | Leducq, et al. <sup>1</sup> | -75,7133658 | 45,428731  | 11861949        | 18                | 16                    | 821342   |
| MSH-604         | Leducq, et al. <sup>1</sup> | -73,1790126 | 45,5640416 | 11835292        | 18                | 16                    | 763954   |
| LL2011_012      | Leducq, et al. <sup>1</sup> | -71,6415386 | 46,870113  | 11959616        | 19                | 16                    | 684142   |
| LL2012_016      | Leducq, et al. <sup>1</sup> | -71,859351  | 46,665643  | 12014617        | 19                | 16                    | 692747   |
| R23             | Xia, et al. <sup>2</sup>    | -79,6660259 | 43,5471097 | 11960863        | 20                | 16                    | 778202   |
| WX20            | Xia, et al. <sup>2</sup>    | -79,6660259 | 43,5471097 | 12028897        | 19                | 16                    | 777535   |

**Supplementary Table 2. Fifty-one fixed and introgressed genes in *SpC\** with *SpB* origin.**

| Chromosome | Gene Start<br>[bp position] | Gene End<br>[bp position] | Gene ID         | Gene Name | Strand |
|------------|-----------------------------|---------------------------|-----------------|-----------|--------|
| chrMT      | 8430                        | 14712                     | COB             | COB       | +      |
| chrIII     | 106374                      | 108275                    | CBS432_03G00420 | YCL025C   | -      |
| chrIV      | 1459391                     | 1460548                   | CBS432_04G07050 | YDR532C   | -      |
| chrIV      | 1461318                     | 1462031                   | CBS432_04G07060 | YDR533C   | -      |
| chrIV      | 1474613                     | 1475647                   | CBS432_04G07110 | YDR541C   | -      |
| chrV       | 162251                      | 163807                    | CBS432_05G00760 | YER007W   | +      |
| chrV       | 165581                      | 169597                    | CBS432_05G00780 | YER008C   | -      |
| chrV       | 537305                      | 538567                    | CBS432_05G02520 | YER178W   | +      |
| chrV       | 538947                      | 540042                    | CBS432_05G02530 | YER179W   | +      |
| chrV       | 543277                      | 543990                    | CBS432_05G02560 | YER182W   | +      |
| chrVI      | 181326                      | 181838                    | CBS432_06G00710 | YFR011C   | -      |
| chrVI      | 182464                      | 183885                    | CBS432_06G00720 | YFR012W   | +      |
| chrVI      | 184488                      | 186863                    | CBS432_06G00730 | YFR013W   | +      |
| chrVI      | 187123                      | 188460                    | CBS432_06G00740 | YFR014C   | -      |
| chrVI      | 188845                      | 190971                    | CBS432_06G00750 | YFR015C   | -      |
| chrVI      | 191625                      | 195269                    | CBS432_06G00760 | YFR016C   | -      |
| chrVI      | 196339                      | 196926                    | CBS432_06G00770 | YFR017C   | -      |
| chrVI      | 197223                      | 198308                    | CBS432_06G00780 | YFR018C   | -      |
| chrVI      | 198591                      | 205460                    | CBS432_06G00790 | YFR019W   | +      |
| chrVI      | 206940                      | 207674                    | CBS432_06G00800 | YFR020W   | +      |
| chrVI      | 210991                      | 213186                    | CBS432_06G00820 | YFR022W   | +      |
| chrVI      | 222152                      | 223810                    | CBS432_06G00870 | YFR028C   | -      |
| chrVI      | 224631                      | 226670                    | CBS432_06G00880 | YFR029W   | +      |
| chrVI      | 227019                      | 230126                    | CBS432_06G00890 | YFR030W   | +      |
| chrVI      | 230316                      | 233828                    | CBS432_06G00900 | YFR031C   | -      |
| chrVI      | 235829                      | 236668                    | CBS432_06G00920 | YFR032C   | -      |
| chrVIII    | 454296                      | 456659                    | CBS432_08G02230 | YHR182W   | +      |
| chrVIII    | 457050                      | 458519                    | CBS432_08G02240 | YHR183W   | +      |
| chrVIII    | 458739                      | 460544                    | CBS432_08G02250 | YHR184W   | +      |
| chrVIII    | 462073                      | 466752                    | CBS432_08G02270 | YHR186C   | -      |
| chrIX      | 288915                      | 292883                    | CBS432_09G01280 | YIL030C   | -      |
| chrXII     | 765132                      | 766070                    | CBS432_12G03530 | YLR340W   | +      |
| chrXII     | 766678                      | 768105                    | CBS432_12G03540 | YLR341W   | +      |

|         |        |        |                 |           |   |
|---------|--------|--------|-----------------|-----------|---|
| chrXII  | 819447 | 821420 | CBS432_12G03800 | YLR369W   | + |
| chrXIII | 460149 | 461858 | CBS432_13G02210 | YMR105C   | - |
| chrXIII | 462554 | 464434 | CBS432_13G02220 | YMR106C   | - |
| chrXIII | 471553 | 475206 | CBS432_13G02250 | YMR109W   | + |
| chrXIII | 475408 | 477006 | CBS432_13G02260 | YMR110C   | - |
| chrXIII | 477438 | 478817 | CBS432_13G02270 | YMR111C   | - |
| chrXIII | 480026 | 481309 | CBS432_13G02290 | YMR113W   | + |
| chrXIII | 482724 | 484229 | CBS432_13G02310 | YMR115W   | + |
| chrXIII | 486297 | 486938 | CBS432_13G02330 | YMR117C   | - |
| chrXIII | 487205 | 487795 | CBS432_13G02340 | YMR118C   | - |
| chrXIII | 489600 | 491495 | CBS432_13G02350 | YMR119W   | + |
| chrXV   | 80252  | 81997  | CBS432_15G00340 | YOL122C   | - |
| chrXVI  | 64736  | 67393  | CBS432_16G00290 | YPL248C   | - |
| chrXVI  | 61679  | 64375  | CBS432_16G00280 | YPL249C   | - |
| chrXVI  | 60719  | 61255  | CBS432_16G00270 | YPL249C-A | - |
| chrXVI  | 884690 | 887314 | CBS432_16G04360 | YPR194C   | - |
| chrXVI  | 891881 | 893293 | CBS432_16G04370 | YPR196W   | + |
| chrXVI  | 894183 | 895814 | CBS432_16G04380 | YPR198W   | + |

---

Gene coordinates from: Yue et al.<sup>3</sup>

**Supplementary Table 3. GO enrichment using GOrilla<sup>6</sup> of the 51 fixed and introgressed genes in *SpC\** (*SpB*-like).**

| GO term    | Description                   | P-value | FDR p-value <sup>7</sup> | Genes                                                                                                                                                       |
|------------|-------------------------------|---------|--------------------------|-------------------------------------------------------------------------------------------------------------------------------------------------------------|
| GO:0043200 | Response to amino acid        | 9.51E-5 | 4.94E-01                 | KOG1 - <b>K</b> ontroler <b>O</b> f <b>G</b> rowth<br>ASI1 - <b>A</b> mino acid <b>S</b> ensor-Independent<br>PTR3 - <b>P</b> eptide <b>T</b> Ransport      |
| GO:0005978 | Glycogen biosynthetic process | 2.22E-4 | 5.77E-1                  | IGD1 - Inhibitor of <b>G</b> lycogen <b>D</b> ebranching<br>GSY1 - <b>G</b> lycogen <b>S</b> Ynthase<br>PGM2 - <b>P</b> hospho <b>G</b> luco <b>M</b> utase |

**Supplementary Table 4: Nine fixed and introgressed genes in *SpD* that were transmitted from *SpB* to *SpC\** to *SpD*. These genes occur at fixed introgressed sites in *SpC\** and were used for dating the age of the *SpD* lineage.**

| Chromosome | GeneStart<br>[bp<br>position] | GeneEnd<br>[bp<br>position] | GeneID          | GeneName | Strand |
|------------|-------------------------------|-----------------------------|-----------------|----------|--------|
| chrV       | 162251                        | 163807                      | CBS432_05G00760 | YER007W  | +      |
| chrV       | 165581                        | 169597                      | CBS432_05G00780 | YER008C  | -      |
| chrVI      | 182464                        | 183885                      | CBS432_06G00720 | YFR012W  | +      |
| chrVI      | 184488                        | 186863                      | CBS432_06G00730 | YFR013W  | +      |
| chrVI      | 187123                        | 188460                      | CBS432_06G00740 | YFR014C  | -      |
| chrVI      | 224631                        | 226670                      | CBS432_06G00880 | YFR029W  | +      |
| chrVI      | 227019                        | 230126                      | CBS432_06G00890 | YFR030W  | +      |
| chrVI      | 230316                        | 233828                      | CBS432_06G00900 | YFR031C  | -      |
| chrXII     | 819447                        | 821420                      | CBS432_12G03800 | YLR369W  | +      |

Gene coordinates from: Yue et al.<sup>3</sup>

**Supplementary Table 5: Subset of 66 strains from the 5 lineages in *S. paradoxus* used for the analysis in BEAST<sup>8</sup>.**

| Strain Name*  | Systematic Name | Lineage     |
|---------------|-----------------|-------------|
| 14_045A       | LL2014_045      | <i>SpA</i>  |
| 14_055A       | LL2014_055      | <i>SpA</i>  |
| 16_119A       | LL2016_119      | <i>SpA</i>  |
| 16_190A       | LL2016_190      | <i>SpA</i>  |
| 16_296A       | LL2016_296      | <i>SpA</i>  |
| LL2012-026A   | LL2012-026      | <i>SpA</i>  |
| yHKS172A      | yHKS172         | <i>SpA</i>  |
| yHRM71-2A     | yHRM71-2        | <i>SpA</i>  |
| 16_097B       | LL2016_097      | <i>SpB</i>  |
| 16_234B       | LL2016_234      | <i>SpB</i>  |
| 16_245B       | LL2016_245      | <i>SpB</i>  |
| 16_250B       | LL2016_250      | <i>SpB</i>  |
| 95-7-1DB      | 95-7-1D         | <i>SpB</i>  |
| LL13-049B     | LL2013-049      | <i>SpB</i>  |
| LL2012_002B   | LL2012_002      | <i>SpB</i>  |
| MSH-483B      | MSH-483         | <i>SpB</i>  |
| R11B          | R11             | <i>SpB</i>  |
| R42B          | R42             | <i>SpB</i>  |
| UWOPS-79-140B | UWOPS-79-14     | <i>SpB</i>  |
| WX36B         | WX36            | <i>SpB</i>  |
| WX7B          | WX7             | <i>SpB</i>  |
| yHBJ9B        | yHBJ9           | <i>SpB</i>  |
| yHKS223B      | yHKS223         | <i>SpB</i>  |
| yHKS306B      | yHKS306         | <i>SpB</i>  |
| YPS618B       | YPS618          | <i>SpB</i>  |
| YPS631B       | YPS631          | <i>SpB</i>  |
| 14_100C       | LL2014_100      | <i>SpC</i>  |
| 14_124C       | LL2014_124      | <i>SpC</i>  |
| 16_035C       | LL2016_035      | <i>SpC</i>  |
| LL13-152C     | LL2013-152      | <i>SpC</i>  |
| LL17-2C       | LL2017-2        | <i>SpC</i>  |
| LL2012-027C   | LL2012-027      | <i>SpC</i>  |
| MSH2B12C      | MSH2B12         | <i>SpC</i>  |
| yHKS225C      | yHKS225         | <i>SpC</i>  |
| 14_067Ci      | LL2014_067      | <i>SpC*</i> |
| 14_092Ci      | LL2014_092      | <i>SpC*</i> |
| 14_121Ci      | LL2014_121      | <i>SpC*</i> |

|              |            |             |
|--------------|------------|-------------|
| 14_161Ci     | LL2014_161 | <i>SpC*</i> |
| 14_178Ci     | LL2014_178 | <i>SpC*</i> |
| 16_199Ci     | LL2016_199 | <i>SpC*</i> |
| LL13-010Ci   | LL2013-010 | <i>SpC*</i> |
| LL13-012Ci   | LL2013-012 | <i>SpC*</i> |
| LL2011-005Ci | LL2011-005 | <i>SpC*</i> |
| LL2011_006Ci | LL2011_006 | <i>SpC*</i> |
| LL2012_016Ci | LL2012_016 | <i>SpC*</i> |
| LL2012-016Ci | LL2012-016 | <i>SpC*</i> |
| LL2012_018Ci | LL2012_018 | <i>SpC*</i> |
| LL2012-018Ci | LL2012-018 | <i>SpC*</i> |
| LL2012_020Ci | LL2012_020 | <i>SpC*</i> |
| PPC23-2Ci    | PPC23-2    | <i>SpC*</i> |
| UCD62-186Ci  | UCD62-186  | <i>SpC*</i> |
| UCD62-268Ci  | UCD62-268  | <i>SpC*</i> |
| yHKS414Ci    | yHKS414    | <i>SpC*</i> |
| B3D          | B3         | <i>SpD</i>  |
| M1D          | M1         | <i>SpD</i>  |
| M2D          | M2         | <i>SpD</i>  |
| M3D          | M3         | <i>SpD</i>  |
| R19D         | R19        | <i>SpD</i>  |
| R20D         | R20        | <i>SpD</i>  |
| R21D         | R21        | <i>SpD</i>  |
| R22D         | R22        | <i>SpD</i>  |
| R23D         | R23        | <i>SpD</i>  |
| R24D         | R24        | <i>SpD</i>  |
| WX19D        | WX19       | <i>SpD</i>  |
| WX20D        | WX20       | <i>SpD</i>  |
| WX21D        | WX21       | <i>SpD</i>  |

---

\*Note that to simplify the discrimination of strains, some might have a lineage-identifier in the end of its name (e.g. "B" for SpB, "D" for SpD or "Ci" for SpC\*)

**Supplementary Table 6: Results of dating the divergence of *S. paradoxus* lineages.**

| <b>Divergence between:</b>              | <b>9 genes (21 kb)</b>                                   | <b>4 fragments (630 kb)</b>                          | <b>Leducq et al.<sup>1</sup></b> |
|-----------------------------------------|----------------------------------------------------------|------------------------------------------------------|----------------------------------|
| <i>SpA</i> from <i>SpB</i> - <i>SpC</i> | 158,000 ± 78,000 years ago                               | 139,000 ± 28,000 years ago                           | 176,200 ± 36,600 years ago       |
| <i>SpB</i> and <i>SpC</i>               | 96,000 ± 20,000 years ago                                | 96 ± 20,000 years ago                                | 110,000 ± 10,000 years ago       |
| <i>SpB</i> and <i>SpC</i> *             | 18,500 ± 5,000 years ago                                 | Not calculated                                       | 15,400 ± 4,000 years ago         |
| <i>SpC</i> and <i>SpC</i> *             | Not calculated <sup>i</sup>                              | Not calculated                                       | 10,500 ± 4,300 years ago         |
| <i>SpC</i> * and <i>SpD</i>             | 2,600 ± 950 years ago                                    | 4,100 ± 850 years ago                                | No data available                |
| <b>Divergence within:</b>               |                                                          |                                                      |                                  |
| <i>SpA</i>                              | 230 ± 70 years ago                                       | 300 ± 100 years ago                                  | 286 ± 174 years ago              |
| <i>SpB</i>                              | 14,800 ± 3,900 (34,700 ± 8,500 <sup>ii</sup> ) years ago | 18,100 ± 3,700 (34 ± 7,000 <sup>ii</sup> ) years ago | 15,400 ± 4,000 years ago         |
| <i>SpC</i>                              | 6,800 ± 2,500 years ago                                  | Not calculated                                       | 8,200 ± 2,300 years ago          |
| <i>SpC</i> *                            | 4,000 ± 1,450 years ago                                  | Not calculated                                       | 6,500 to 10,400 years ago        |
| <i>SpD</i>                              | 1,800 ± 750 years ago                                    | 3,000 ± 600 years ago                                | No data available                |

<sup>i</sup> Not available, as *SpC* and *SpC*\* do not share direct inheritance for introgressed genes of *SpB*-origin

<sup>ii</sup> including outlier yHKS306B that branches earlier



**Supplementary Table 7. List of strains as part of the transcriptomic study.**

| <b>Systematic Name</b> | <b>Mating_type</b> | <b>Genotype</b> | <b>Genetic_Group</b> | <b>Location_Sampled</b>                            |
|------------------------|--------------------|-----------------|----------------------|----------------------------------------------------|
| 95-7-1D                | Diploid            | Wild            | <i>SpB</i>           | East Lansing, Michigan, USA                        |
| LL2011_003             | Diploid            | Wild            | <i>SpC</i>           | Cap Chat, Quebec, Canada                           |
| LL2011_005             | Diploid            | Wild            | <i>SpC*</i>          | Ile d'Orleans, Quebec, Canada                      |
| LL2011_006             | Diploid            | Wild            | <i>SpC*</i>          | Ile d'Orleans, Quebec, Canada                      |
| LL2012_014             | Diploid            | Wild            | <i>SpB</i>           | St Michel de Bellechasse, Quebec, Canada           |
| LL2012_016             | Diploid            | Wild            | <i>SpC*</i>          | Pointe Platon, Quebec, Canada                      |
| LL2012_016             | Diploid            | Wild            | <i>SpC*</i>          | Pointe Platon, Quebec, Canada                      |
| LL2012_020             | Diploid            | Wild            | <i>SpC*</i>          | Pointe Platon, Quebec, Canada                      |
| LL2012_026             | Diploid            | Wild            | <i>SpA</i>           | Sherbrooke, Quebec, Canada                         |
| LL2012_027             | Diploid            | Wild            | <i>SpC</i>           | Sherbrooke, Quebec, Canada                         |
| LL2013_012             | Diploid            | Wild            | <i>SpC*</i>          | Quebec, Quebec, Canada                             |
| MSH-587-1              | Diploid            | Wild            | <i>SpC</i>           | Mont St Hilaire, Quebec, Canada                    |
| MSH-604                | Diploid            | Wild            | <i>SpB</i>           | Mont St Hilaire, Quebec, Canada                    |
| R13                    | Diploid            | Wild            | <i>SpB</i>           | University of Toronto Mississauga, Ontario, Canada |
| R19                    | Diploid            | Wild            | <i>SpD</i>           | University of Toronto Mississauga, Ontario, Canada |
| R20                    | Diploid            | Wild            | <i>SpD</i>           | University of Toronto Mississauga, Ontario, Canada |
| R22                    | Diploid            | Wild            | <i>SpD</i>           | University of Toronto Mississauga, Ontario, Canada |
| R24                    | Diploid            | Wild            | <i>SpD</i>           | University of Toronto Mississauga, Ontario, Canada |
| R33                    | Diploid            | Wild            | <i>SpB</i>           | University of Toronto Mississauga, Ontario, Canada |
| UWOPS_79-140           | Diploid            | Wild            | <i>SpB</i>           | Saint-Joseph Island, Ontario, Canada               |
| WX19                   | Diploid            | Wild            | <i>SpD</i>           | University of Toronto Mississauga, Ontario, Canada |
| WX21                   | Diploid            | Wild            | <i>SpD</i>           | University of Toronto Mississauga, Ontario, Canada |
| WX26                   | Diploid            | Wild            | <i>SpB</i>           | University of Toronto Mississauga, Ontario, Canada |
| YPS744                 | Diploid            | Wild            | <i>SpA</i>           | Tuscarora, New York, USA                           |

**Supplementary Table 7 (continued).**

| <b>Systematic Name</b> | <b>Substrate_Sampled</b> | <b>Published in</b>         | <b>lon</b>  | <b>lat</b> |
|------------------------|--------------------------|-----------------------------|-------------|------------|
| 95-7-1D                | Bark - Oak tree          | Leducq, et al. <sup>1</sup> | -84,4838654 | 42,7369792 |
| LL2011_003             | Bark - Mapple tree       | Leducq, et al. <sup>1</sup> | -66,6857394 | 49,0940662 |
| LL2011_005             | Bark - Mapple tree       | Leducq, et al. <sup>1</sup> | -70,931194  | 46,9295317 |
| LL2011_006             | Rotten apple             | Leducq, et al. <sup>1</sup> | -66,6857394 | 49,0940662 |
| LL2012_014             | Bark - Mapple tree       | Leducq, et al. <sup>1</sup> | -70,9095727 | 46,8554265 |
| LL2012_016             | Bark - Oak tree          | Leducq, et al. <sup>1</sup> | -71,859351  | 46,665643  |
| LL2012_016             | Bark - Oak tree          | Leducq, et al. <sup>1</sup> | -71,859351  | 46,665643  |
| LL2012_020             | Bark - Oak tree          | Leducq, et al. <sup>1</sup> | -71,859351  | 46,665643  |
| LL2012_026             | Bark - Mapple tree       | Leducq, et al. <sup>1</sup> | -71,8824288 | 45,4009928 |
| LL2012_027             | Bark - Mapple tree       | Leducq, et al. <sup>1</sup> | -71,8824288 | 45,4009928 |
| LL2013_012             | Soil - Oak tree          | Leducq, et al. <sup>1</sup> | -71,2079809 | 46,8138783 |
| MSH-587-1              | Bark - Oak tree          | Leducq, et al. <sup>1</sup> | -73,1790126 | 45,5640416 |
| MSH-604                | Bark - Oak tree          | Leducq, et al. <sup>1</sup> | -73,1790126 | 45,5640416 |
| R13                    | Quercus                  | Xia, et al. <sup>2</sup>    | -79,6660259 | 43,5471097 |
| R19                    | Quercus                  | Xia, et al. <sup>2</sup>    | -79,6660259 | 43,5471097 |
| R20                    | Quercus                  | Xia, et al. <sup>2</sup>    | -79,6660259 | 43,5471097 |
| R22                    | Quercus                  | Xia, et al. <sup>2</sup>    | -79,6660259 | 43,5471097 |
| R24                    | Quercus                  | Xia, et al. <sup>2</sup>    | -79,6660259 | 43,5471097 |
| R33                    | Quercus                  | Xia, et al. <sup>2</sup>    | -79,6660259 | 43,5471097 |
| UWOPS_79-140           | Knot - Apple tree        | Leducq, et al. <sup>1</sup> | -83,9667213 | 46,2227098 |
| WX19                   | Quercus                  | Xia, et al. <sup>2</sup>    | -79,6660259 | 43,5471097 |
| WX21                   | Quercus                  | Xia, et al. <sup>2</sup>    | -79,6660259 | 43,5471097 |
| WX26                   | Quercus                  | Xia, et al. <sup>2</sup>    | -79,6660259 | 43,5471097 |
| YPS744                 | Bark - Oak tree          | Leducq, et al. <sup>1</sup> | -77,8697236 | 42,6306196 |

**Supplementary Table 8: Assembly and annotation statistics of lineage-specific reference genomes for the transcriptomic analysis.**

Assembly:

| <b>Lineage</b> | Total sequence length | Number of contigs | Contigs N50 | Number of chromosomes | Total number of scaffolds* |
|----------------|-----------------------|-------------------|-------------|-----------------------|----------------------------|
| <i>SpA</i>     | 11622321              | 781               | 139392      | 17                    | 85                         |
| <i>SpB</i>     | 11736119              | 706               | 154133      | 17                    | 73                         |
| <i>SpC</i>     | 11789292              | 830               | 122691      | 17                    | 68                         |
| <i>SpC*</i>    | 11786280              | 773               | 131537      | 17                    | 17                         |
| <i>SpD1</i>    | 12012101              | 1297              | 124328      | 17                    | 227                        |
| <i>SpD2</i>    | 11927420              | 1323              | 153967      | 17                    | 128                        |

Annotation:

| <b>Lineage</b> | Augustus <sup>9</sup> gene prediction | Extended prediction** | Annotated genes*** |
|----------------|---------------------------------------|-----------------------|--------------------|
| <i>SpA</i>     | 5398                                  | 6636                  | 5316               |
| <i>SpB</i>     | 5409                                  | 6692                  | 5335               |
| <i>SpC</i>     | 5411                                  | 6868                  | 5315               |
| <i>SpC*</i>    | 5427                                  | 6778                  | 5339               |
| <i>SpD1</i>    | 5438                                  | 6965                  | 5355               |
| <i>SpD2</i>    | 5435                                  | 6995                  | 5350               |

\* chromosomes + unplaced scaffolds

\*\* from transcription data

\*\*\* detected orthologous gene in reference strain CBS432

## SUPPLEMENTARY REFERENCES

- 1 Leducq, J.-B. *et al.* Speciation driven by hybridization and chromosomal plasticity in a wild yeast. *Nature Microbiology* **1**, 15003, doi:10.1038/nmicrobiol.2015.3 (2016).
- 2 Xia, W. *et al.* Population genomics reveals structure at the individual, host-tree scale and persistence of genotypic variants of the undomesticated yeast *Saccharomyces paradoxus* in a natural woodland. *Mol Ecol* **26**, 995-1007, doi:10.1111/mec.13954 (2017).
- 3 Yue, J. X. *et al.* Contrasting evolutionary genome dynamics between domesticated and wild yeasts. *Nat Genet* **49**, 913-924, doi:10.1038/ng.3847 (2017).
- 4 Earl, D. A. & vonHoldt, B. M. STRUCTURE HARVESTER: a website and program for visualizing STRUCTURE output and implementing the Evanno method. *Conservation Genetics Resources* **4**, 359-361, doi:10.1007/s12686-011-9548-7 (2012).
- 5 Love, M. I., Huber, W. & Anders, S. Moderated estimation of fold change and dispersion for RNA-seq data with DESeq2. *Genome Biol* **15**, 550, doi:10.1186/s13059-014-0550-8 (2014).
- 6 Eden, E., Navon, R., Steinfeld, I., Lipson, D. & Yakhini, Z. GOrilla: a tool for discovery and visualization of enriched GO terms in ranked gene lists. *BMC Bioinformatics* **10**, 48, doi:10.1186/1471-2105-10-48 (2009).
- 7 Benjamini, Y. & Hochberg, Y. Controlling the False Discovery Rate: A Practical and Powerful Approach to Multiple Testing. *Journal of the Royal Statistical Society. Series B (Methodological)* **57**, 289-300 (1995).
- 8 Bouckaert, R. *et al.* BEAST 2: a software platform for Bayesian evolutionary analysis. *PLoS Comput Biol* **10**, e1003537, doi:10.1371/journal.pcbi.1003537 (2014).
- 9 Stanke, M. *et al.* AUGUSTUS: ab initio prediction of alternative transcripts. *Nucleic Acids Res* **34**, W435-439, doi:10.1093/nar/gkl200 (2006).
