# Supplementary material for: Hybridization is a recurrent evolutionary stimulus in wild yeast speciation
Source: PubMed Central journal article supplement (PMC6389940; doi:10.1038/s41467-019-08809-7), 2019-02-25
Supplement: 41467_2019_8809_MOESM3_ESM.pdf [file 41467_2019_8809_MOESM3_ESM.pdf]

## **Description of Additional Supplementary Files**

File Name: Supplementary Data 1

Description: Geographical location of strains from 5 groups in North America.

File Name: Supplementary Data 2

Description: Sequence statistics for 74 newly sequenced genomes with Illumina.

File Name: Supplementary Data 3

Description: Twenty-five conditions used for high-throughput growth measurement.

File Name: Supplementary Data 4

Description: Library and sequencing statistics for the 48 transcriptomes.

File Name: Supplementary Data 5

Description: GO enrichment using GOrilla of pairwise comparisons with ranked gene lists using P-adjust.

File Name: Supplementary Data 6

Description: Reproductive isolation from spore viability of intra- and inter-lineage crosses.
